# Supplementary material
Source: PubMed Central journal article supplement (PMC4986616)
Supplement: NIHMS809150-supplement-Supplement1.pdf [file NIHMS809150-supplement-Supplement1.pdf]

## Supplementary Appendix

This appendix has been provided by the authors to give readers additional information about their work.

Supplement to: Pritchard CC, Mateo J, Walsh MF, et al. Inherited DNA-repair gene mutations in men with metastatic prostate cancer. *N Engl J Med* 2016;375:443-53. DOI: [10.1056/NEJMoa1603144](https://doi.org/10.1056/NEJMoa1603144)

# Supplementary Appendix

## Supplement to: Pritchard CC, Mateo J, Walsh MF, *et al* Inherited DNA Repair Gene Mutations in Men with Metastatic Prostate Cancer

### Contents

|                                                                                                                                   |         |
|-----------------------------------------------------------------------------------------------------------------------------------|---------|
| Lists of Investigators:                                                                                                           | page 2  |
| Table S1: Detail on Pathogenic Germline DNA Repair Mutations in 7 Metastatic Prostate Cancer Series                               | page 3  |
| Table S2: Detail on Pathogenic Germline DNA Repair Mutations in Primary Prostate Cancer from TCGA                                 | page 6  |
| Table S3: Detailed Demographics of Each Series                                                                                    | page 7  |
| Table S4: Mean Sequencing Depth of Coverage by Gene for Each Series                                                               | page 27 |
| Table S5: Germline DRG Mutations in Metastatic Cases Compared to the General Population and Primary Cases Excluding Case Series 1 | page 28 |
| Table S6: Germline DRG Mutations in Metastatic Prostate Cancer vs Primary Prostate Cancer by NCCN Risk Category                   | page 29 |

## List of Investigators:

Colin C. Pritchard, M.D., Ph.D.\*<sup>1</sup>, Joaquin Mateo, M.D.\*<sup>2</sup>, Michael F. Walsh, M.D.\*<sup>3</sup>, Navonil De Sarkar, Ph.D.<sup>4</sup>, Wassim Abida, M.D.<sup>3</sup>, Himisha Beltran, M.D.<sup>5</sup>, Andrea Garofalo, B.Sc.<sup>8</sup>, Roman Gulati, B.Sc.<sup>4</sup>, Suzanne Carreira, Ph.D.<sup>2</sup>, Rosalind Eeles, M.D., Ph.D.<sup>2</sup>, Olivier Elemento, Ph.D.<sup>5</sup>, Mark A. Rubin, M.D.<sup>5</sup>, Dan Robinson, Ph.D.<sup>6</sup>, Robert Lonigro, Ph.D.<sup>6</sup>, Maha Hussain, M.D.<sup>6</sup>, Arul Chinnaiyan, M.D., Ph.D.<sup>6</sup>, Jake Vinson, B.Sc.<sup>7</sup>, Julie Filipenko, B.Sc.<sup>7</sup>, Levi Garraway, M.D., Ph.D.<sup>8</sup>, Mary-Elle Taplin, M.D.<sup>8</sup>, Saud AlDubayan, Ph.D.<sup>8</sup>, G. Celine Han, Ph.D.<sup>8</sup>, Mallory Beightol, B.Sc.<sup>1</sup>, Colm Morrissey, Ph.D.<sup>1</sup>, Belinda Nghiem, B.Sc.<sup>1</sup>, Heather H. Cheng, M.D., Ph.D.<sup>1</sup>, Bruce Montgomery, M.D.<sup>1</sup>, Tom Walsh, Ph.D.<sup>1</sup>, Silvia Casadei, Ph.D.<sup>1</sup>, Michael Berger, Ph.D.<sup>3</sup>, Liying Zhang, M.D., Ph.D.<sup>3</sup>, Ahmet Zehir, Ph.D.<sup>3</sup>, Joseph Vijai, Ph.D.<sup>3</sup>, Howard I. Scher, M.D.<sup>3</sup>, Charles Sawyers, M.D.<sup>3</sup>, Nikolaus Schultz, Ph.D.<sup>3</sup>, Philip Kantoff, M.D.<sup>3</sup>, David Solit, M.D.<sup>3</sup>, Mark Robson, M.D.<sup>3</sup>, Eliezer M. Van Allen, M.D., Ph.D.<sup>8</sup>, Kenneth Offit, M.D.<sup>3#</sup>, Johann de Bono, M.B., Ch.B., Ph.D.<sup>2#</sup>, and Peter S. Nelson, M.D.<sup>1,4,#</sup>

<sup>1</sup>University of Washington, Seattle, WA

<sup>2</sup>The Institute of Cancer Research and Royal Marsden Hospital, London, UK

<sup>3</sup>Memorial Sloan Kettering Cancer Center, New York, NY

<sup>4</sup>Fred Hutchinson Cancer Research Center, Seattle, WA

<sup>5</sup>Weill Cornell Medicine, New York, NY

<sup>6</sup>University of Michigan, Ann Arbor, MI

<sup>7</sup>Prostate Cancer Clinical Trials Consortium, New York, NY

<sup>8</sup>Dana Farber Cancer Institute, Boston, MA

**Table S1:** Detail on Pathogenic Germline DNA Repair Mutations in 7 Metastatic Prostate Cancer Series

| ID                                                    | Gene    | p.            | c.                                  | Tumor LOH/<br>2nd Hit | Age of<br>Onset | Gleason | Race/<br>Ethnicity | Var.<br>Class* |
|-------------------------------------------------------|---------|---------------|-------------------------------------|-----------------------|-----------------|---------|--------------------|----------------|
| <b>1: SU2C/PCF Discovery, n=150 (Robinson et al.)</b> |         |               |                                     |                       |                 |         |                    |                |
| SC_9059                                               | ATM     | p.V1268*      | NM_000051.3:c.3802del               | LOH                   | 51              | 8(4+4)  | white              | P              |
| MO_1221                                               | ATM     | splicing      | NM_000051.3:c.7630-2C>T             | LOH                   | 50              | 9(4+5)  | white              | LP             |
| SC_9072                                               | ATM     | p.W2638*      | NM_000051.3:c.7913G>A               | not detected          | 61              | unknown | black              | P              |
| MO_1232                                               | BRCA1   | p.Q1756Pfs*74 | NM_007294.3:c.5266dup<br>(5382insC) | not detected          | 61              | 9(4+5)  | white              | P              |
| MO_1071                                               | BRCA1   | p.C61G        | NM_007294.3:c.181T>G                | LOH                   | 49              | unknown | white              | P              |
| SM-67ES4                                              | BRCA2   | p.Q699Sfs*31  | NM_000059.3:c.2094del               | p.L2362Cfs*5          | 64              | 9(4+5)  | white              | P              |
| SC_9061                                               | BRCA2   | p.K1057Tfs*8  | NM_000059.3:c.3170_3174del          | LOH                   | 66              | 9(4+5)  | white              | P              |
| MO_1176                                               | BRCA2   | p.L1491Qfs*12 | NM_000059.3:c.4472_4475del          | LOH                   | 55              | 10(5+5) | white              | P              |
| MO_1013                                               | BRCA2   | p.E1493Vfs*10 | NM_000059.3:c.4478_4481del          | LOH                   | 50              | 8(4+4)  | white              | P              |
| SC_9076                                               | BRCA2   | p.I1516Dfs*13 | NM_000059.3:c.4544dup               | LOH                   | 65              | 8(4+4)  | asian              | P              |
| TP_2054                                               | BRCA2   | p.S1882*      | NM_000059.3:c.5645C>A               | LOH                   | 67              | 10(5+5) | unknown            | P              |
| SC_9090                                               | BRCA2   | p.S1955*      | NM_000059.3:c.5864C>A               | LOH;<br>p.D1575Y      | 72              | 8(4+4)  | white              | P              |
| SC_9022                                               | BRCA2   | p.S1982Dfs*22 | NM_000059.3:c.5946del (6174delT)    | LOH                   | 57              | 7(4+3)  | white              | P              |
| SC_9083                                               | BRCA2   | p.V2969Cfs*7  | NM_000059.3:c.8904del               | p.S871Qfs*3           | 53              | 8(5+3)  | white              | P              |
| MO_1124                                               | RAD51D  | splicing      | NM_002878.3:c.264-1G>A              | not detected          | 42              | unknown | white              | LP             |
| <b>2: SU2C/PCF Validation, n=84</b>                   |         |               |                                     |                       |                 |         |                    |                |
| SM-4JC6B                                              | ATM     | p.K2589Nfs*17 | NM_000051.3:c.7767del               | unknown               | 61              | 8(4+4)  | hispanic           | P              |
| SC_9079                                               | ATM     | splicing      | NM_000051.3:c.8418+1_8418+4del      | unknown               | 55              | unknown | white              | LP             |
| SM-5CQ5A                                              | ATR     | p.R2148*      | NM_001184.3:c.6442C>T               | LOH                   | 57              | 9(4+5)  | white              | LP             |
| SC_9137                                               | BRCA1   | p.Q1756Pfs*74 | NM_007294.3:c.5266dup<br>(5382insC) | LOH;<br>p.T1196A      | 64              | 7(4+3)  | white              | P              |
| SM-7LGUA                                              | BRCA1   | p.Q1756Pfs*74 | NM_007294.3:c.5266dup<br>(5382insC) | LOH                   | 73              | 7(3+4)  | white              | P              |
| SC_9085                                               | BRCA2   | p.V1283Kfs*2  | NM_000059.3:c.3847_3848del          | not detected          | 62              | unknown | white              | P              |
| SC_9025                                               | BRCA2   | p.N1626Sfs*12 | NM_000059.3:c.4876_4877del          | not detected          | 54              | 7(4+3)  | white              | P              |
| SC_9004                                               | BRCA2   | p.V1862Efs*11 | NM_000059.3:c.5585_5588del          | LOH                   | 55              | 9(4+5)  | white              | P              |
| TP_2077                                               | FAM175A | p.I343Sfs*7   | NM_139076.2:c.1027del               | not detected          | unknown         | unknown | unknown            | LP             |
| <b>3: Royal Marsden, n=131</b>                        |         |               |                                     |                       |                 |         |                    |                |
| RM037                                                 | ATM     | p.E1971Rfs*19 | NM_000051.3:c.5910del               | p.I2752F (in<br>KD)   | 59.9            | 10      | white              | P              |
| RM129                                                 | BRCA2   | p.P9Qfs*16    | NM_000059.3:c.26del                 | LOH                   | 54.8            | unknown | white              | P              |
| RM128                                                 | BRCA2   | splicing      | NM_000059.3:c.517-2A>G              | LOH                   | 60.6            | 9       | white              | P              |
| RM077                                                 | BRCA2   | p.V1283Kfs*2  | NM_000059.3:c.3847_3848del          | LOH                   | 68.1            | 9       | white              | P              |
| RM142                                                 | BRCA2   | p.S1882*      | NM_000059.3:c.5645C>A               | LOH                   | 63.3            | 9       | white              | P              |
| RM152                                                 | BRCA2   | p.L2253Ffs*7  | NM_000059.3:c.6757_6758del          | LOH                   | 53.4            | 7       | white              | P              |
| RM049                                                 | BRCA2   | p.Y2660*      | NM_000059.3:c.7980T>G               | unknown               | 61.3            | unknown | white              | P              |
| RM004                                                 | BRCA2   | p.Q2859Kfs*4  | NM_000059.3:c.8575del               | LOH                   | 62.8            | unknown | white              | P              |
| RM010                                                 | CHEK2   | p.S428F       | NM_007194.3:c.1283C>T               | not detected          | 72.6            | 9       | white              | LP             |
| RM072                                                 | MRE11A  | p.Y179*       | NM_005591.3:c.537T>A                | not detected          | 64.6            | 8       | white              | LP             |
| RM003                                                 | MSH6    | p.Y214*       | NM_000179.2:c.642C>G                | hypermutation         | 64.1            | 8       | white              | P              |
| RM169                                                 | NBN     | p.K219Nfs*16  | NM_002485.4:c.657_661del            | not detected          | 61.7            | 9       | white              | P              |

|                                                  |                              |                        |                                   |              |      |         |          |    |
|--------------------------------------------------|------------------------------|------------------------|-----------------------------------|--------------|------|---------|----------|----|
| RM047                                            | <i>PALB2</i>                 | p.W1038*               | NM_024675.3:c.3113G>A             | unknown      | 53.4 | 9       | white    | P  |
| RM005                                            | <i>PALB2</i>                 | p.W1038*               | NM_024675.3:c.3113G>A             | not detected | 63.4 | 9       | white    | P  |
| RM061                                            | <i>RAD51C</i>                | p.L61Afs*11            | NM_058216.1:c.179_180del          | unknown      | 73.1 | 9       | white    | P  |
| RM122                                            | <i>RAD51D</i>                | p.T272Lfs*58           | NM_001142571.1:c.814del           | unknown      | 47.1 | 9       | white    | P  |
| <b>4: University of Washington, n=91</b>         |                              |                        |                                   |              |      |         |          |    |
| 06-134                                           | <i>ATM</i>                   | p.K468Efs*18           | NM_000051.3:c.1402_1403del        | LOH          | 67   | 9 (5+4) | asian    | P  |
| 09-012                                           | <i>BRCA2</i>                 | p.S1955*               | NM_000059.3:c.5864C>A             | unknown      | 59   | 9(4+5)  | white    | P  |
| 05-011                                           | <i>BRCA2</i>                 | p.S1982Rfs*22          | NM_000059.3:c.5946del (6174delT)  | LOH          | 73   | 7 (3+4) | white    | P  |
| 07-097                                           | <i>BRCA2</i>                 | p.S1982Rfs*22          | NM_000059.3:c.5946del (6174delT)  | LOH          | 63   | 8 (4+4) | white    | P  |
| 99-091                                           | <i>CHEK2</i>                 | p.V198Ffs*7            | NM_007194.3:c.591del              | not detected | 73   | 9(4+5)  | unknown  | P  |
| 98-372                                           | <i>CHEK2</i>                 | p.Y113*                | NM_007194.3:c.339C>G              | not detected | 66   | unknown | asian    | LP |
| 13-117                                           | <i>GEN1</i>                  | p.Q430*                | NM_182625.3:c.1288C>T             | unknown      | 56   | 9(4+5)  | white    | LP |
| 01-002                                           | <i>MSH2 ex1-8 +EPCAM del</i> |                        | <i>MSH2 ex1-8 +EPCAM del</i>      | LOH + MSI    | 43   | 9(4+5)  | white    | P  |
| <b>5: Weill Cornell Precision Medicine, n=69</b> |                              |                        |                                   |              |      |         |          |    |
| PM156                                            | <i>ATM</i>                   | p.L1255*               | NM_000051.3:c.3764del             | not detected | 61   | unknown | unknown  | P  |
| PM365                                            | <i>ATM</i>                   | p.S1731*               | NM_000051.3:c.5192C>G             | not detected | 76   | unknown | white    | P  |
| PM195                                            | <i>ATR</i>                   | Large del              | del exon 45-47 + 3'UTR            | not detected | 69   | 5 (3+2) | white    | P  |
| PM258                                            | <i>BRCA2</i>                 | p.A938Pfs*21           | NM_000059.3:c.2808_2811del        | not detected | 59   | 7(4+3)  | hispanic | P  |
| PM183                                            | <i>BRCA2</i>                 | p.E1308*               | NM_000059.3:c.3922G>T             | not detected | 59   | 7(4+3)  | hispanic | P  |
| PM12                                             | <i>BRCA2</i>                 | p.E2198Nfs*4           | NM_000059.3:c.6591_6592del        | not detected | 67   | 9(4+5)  | white    | P  |
| PM156                                            | <i>CHEK2</i>                 | p.T367Mfs*15           | NM_007194.3:c.1100del             | not detected |      | unknown | unknown  | P  |
| PM63                                             | <i>RAD51D</i>                | p.G110Rfs*2            | NM_002878.3:c.326dup              | not detected | 55   | 8(4+4)  | black    | P  |
| <b>6: University of Michigan, n=43</b>           |                              |                        |                                   |              |      |         |          |    |
| WA_24                                            | <i>ATM</i>                   | p.G1458Efs*15          | NM_000051.3:c.4373del             | not detected | 72   | 8       | white    | P  |
| WA_40                                            | <i>BRCA1</i>                 | splicing               | NM_007294.3:c.5075-1G>A           | LOH          | 72   | 10      | white    | P  |
| WA_46                                            | <i>GEN1</i>                  | p.R406*                | NM_182625.3:c.1216C>T             | unknown      | 66   | 9       | white    | LP |
| WA_29                                            | <i>PMS2</i>                  | p.V68Wfs*20            | NM_000535.5:c.202_212del          | unknown      | 67   | 8       | white    | P  |
| <b>7: Memorial Sloan Kettering, n=124</b>        |                              |                        |                                   |              |      |         |          |    |
| MSK003                                           | <i>ATM</i>                   | p.R248*                | NM_000051.3:c.742C>T              | unknown      | 62   | 4+3     | white    | P  |
| MSK004                                           | <i>BRCA1</i>                 | p.Q1756Pfs*74          | NM_007294.3:c.5266dup (5382insC)  | LOH          | 59   | 4+5     | white    | P  |
| MSK009                                           | <i>BRCA2</i>                 | p.K1789Qfs*18          | NM_000059.3:c.5364dup             | LOH          | 58   | 4+3     | white    | P  |
| MSK015                                           | <i>BRCA2</i>                 | p.R3128*               | NM_000059.3:c.9382C>T             | unknown      | 57   | 4+5     | white    | P  |
| MSK008                                           | <i>BRCA2</i>                 | p.I605Nfs*11           | NM_000059.3:c.1813dup             | unknown      | 59   | 4+4     | white    | P  |
| MSK005                                           | <i>BRCA2</i>                 | p.F1546Lfs*22          | NM_000059.3:c.4638del             | unknown      | 51   | 4+3     | white    | P  |
| MSK006                                           | <i>BRCA2</i>                 | p.S1982Rfs*22          | NM_000059.3:c.5946del (6174delT)  | not detected | 56   | 5+4     | white    | P  |
| MSK007                                           | <i>BRCA2</i>                 | p.S1982Rfs*22          | NM_000059.3:c.5946del (6174delT)  | unknown      | 61   | 4+5     | white    | P  |
| MSK010                                           | <i>BRCA2</i>                 | p.S1982Rfs*22          | NM_000059.3:c.5946del (6174delT)  | unknown      | 58   | 4+4     | white    | P  |
| MSK011                                           | <i>BRCA2</i>                 | p.S1982Rfs*22          | NM_000059.3:c.5946del (6174delT)  | not detected | 49   | 3+4     | white    | P  |
| MSK012                                           | <i>BRCA2</i>                 | p.S1982Rfs*22          | NM_000059.3:c.5946del (6174delT)  | not detected | 64   | 4+4     | white    | P  |
| MSK013                                           | <i>BRCA2</i>                 | p.S1982Rfs*22          | NM_000059.3:c.5946del (6174delT)  | not detected | 58   | 4+5     | white    | P  |
| MSK014                                           | <i>BRCA2</i>                 | p.E2198Nfs*4           | NM_000059.3:c.6591_6592del        | p.N1005fs    | 61   | 5+4     | white    | P  |
| MSK016                                           | <i>BRCA2</i>                 | splicing (del exon 21) | NM_000059.3:c.8754+4A>G (exon 21) | LOH          | 65   | 4+5     | white    | P  |

|        |              |                  |                               |         |    |     |         |    |
|--------|--------------|------------------|-------------------------------|---------|----|-----|---------|----|
| MSK017 | <i>BRIP1</i> | p.R798*          | NM_032043:c.2392C>T           | unknown | 66 | 4+3 | white   | P  |
| MSK007 | <i>CHEK2</i> | p.S428F          | NM_007194.3:c.1283C>T         | unknown | 61 | 4+5 | white   | LP |
| MSK018 | <i>CHEK2</i> | p.T367Mfs*15     | NM_007194.3:c.1100del         | unknown | 48 | 4+4 | white   | P  |
| MSK019 | <i>CHEK2</i> | p.T367Mfs*15     | NM_007194.3:c.1100del         | unknown | 64 | 5+4 | white   | P  |
| MSK020 | <i>CHEK2</i> | p.T367Mfs*15     | NM_007194.3:c.1100del         | unknown | 68 | 4+4 | white   | P  |
| MSK021 | <i>CHEK2</i> | p.T367Mfs*15     | NM_007194.3:c.1100del         | unknown | 54 | 3+4 | white   | P  |
| MSK022 | <i>CHEK2</i> | p.E64K           | NM_007194.3: c.190G>A         | unknown | 75 | 5+4 | white   | LP |
| MSK025 | <i>NBN</i>   | p.L19*           | NM_002485:c.56del             | unknown | 65 | 4+4 | unknown | LP |
| MSK026 | <i>PALB2</i> | exon 11 deletion | NM_024675:.c.exon 11 deletion | LOH     | 66 | 4+5 | white   | P  |
| MSK027 | <i>PMS2</i>  | p.S46I           | NM_00535.5:c.137G>T           | unknown | 64 | 4+4 | white   | LP |

\*Variant classification according to ACMG/AMP guidelines, P= pathogenic, LP= likely pathogenic

**Table S2:** Detail on Pathogenic Germline DNA Repair Mutations in Primary Prostate Cancer from TCGA

| ID           | Gene          | p.            | c.                       | Tumor LOH/ 2nd Hit      | Age of Onset | Gleason | Race/ Ethnicity | Var. Class* |
|--------------|---------------|---------------|--------------------------|-------------------------|--------------|---------|-----------------|-------------|
| tcga-g9-7521 | <i>ATM</i>    | p.V1268*      | NM_000051:c.3802del      | no                      | 52           | 8(4+4)  | white           | P           |
| tcga-ej-5511 | <i>ATM</i>    | p.Y2334Qfs*4  | NM_000051:c.7000_7003del | p.E2164K                | 55           | 7(3+4)  | black           | P           |
| tcga-hc-7745 | <i>ATM</i>    | p.Y264Ifs*12  | NM_000051:c.790del       | loss of germline allele | 65           | 7(4+3)  | white           | LP          |
| tcga-v1-a9zk | <i>ATM</i>    | p.R447*       | NM_000051:c.1339C>T      | no                      | 68           | 9(4+5)  | white           | P           |
| tcga-ch-5753 | <i>ATM</i>    | p.E1978*      | NM_000051:c.5932G>T      | LOH likely              | 70           | 9(4+5)  | white           | P           |
| tcga-hc-8259 | <i>BARB1</i>  | p.V154Efs*8   | NM_000465:c.457_460dup   | no                      | 50           | 6(3+3)  | black           | P           |
| tcga-zg-a9nd | <i>BRCA1</i>  | p.R1751*      | NM_007294:c.5251C>T      | no                      | 55           | 9(5+4)  | white           | P           |
| tcga-hc-8216 | <i>BRCA1</i>  | p.V923Ifs*76  | NM_007294:c.2767_2770del | chr17:g. 41231904G>A    | 58           | 7(4+3)  | white           | P           |
| tcga-hc-7231 | <i>BRCA1</i>  | p.Q1408*      | NM_007294:c.4222C>T      | no                      | 66           | 7(3+4)  | white           | P           |
| tcga-yl-a8si | <i>BRCA2</i>  | p.T1566Dfs*9  | NM_000059:c.4691dup      | no                      | 69           | 9(4+5)  | white           | P           |
| tcga-2a-a8vo | <i>BRIP1</i>  | p.A759Serfs*6 | NM_032043:c.2273dup      | no                      | 57           | 6(3+3)  | white           | P           |
| tcga-v1-a9z8 | <i>CHEK2</i>  | p.T367Mfs*15  | NM_007194:c.1100delC     | no                      | 59           | 9(5+4)  | white           | P           |
| tcga-m7-a71z | <i>CHEK2</i>  | p.T367Mfs*15  | NM_007194:c.1100delC     | LOH                     | 62           | 7(4+3)  | white           | P           |
| tcga-v1-a9zr | <i>MRE11A</i> | p.T408Nfs*49  | NM_005591:c.1222dup      | no                      | 68           | 8(4+4)  | white           | LP          |
| tcga-ch-5769 | <i>MSH2</i>   | p.F136Lfs*38  | NM_000251:c.408del       | hypermuted              | 48           | 9(5+4)  | white           | P           |
| tcga-xk-aaiw | <i>MSH6</i>   | p.F1088Lfs*5  | NM_000179:c.3261dup      | loss of germline allele | 78           | 9(5+4)  | white           | P           |
| tcga-xk-aaja | <i>NBN</i>    | p.L654Afs*5   | NM_002485:c.1958dup      | loss of germline allele | 62           | 7(4+3)  | unknown         | LP          |
| tcga-hc-8256 | <i>PALB2</i>  | p.R686Gfs*23  | NM_024675:c.2052del      | no                      | 53           | 7(3+4)  | black           | P           |
| tcga-hc-a4zv | <i>PALB2</i>  | p.I76Yfs*101  | NM_024675:c.226del       | LOH likely (copy loss)  | 56           | 9(5+4)  | black           | P           |
| tcga-j9-a8cp | <i>PMS2</i>   | p.S46I        | NM_000535:c.137G>T       | no                      | 66           | 7(4+3)  | white           | LP          |
| tcga-ej-a8fn | <i>RAD51C</i> | p.R237*       | NM_058216:c.709C>T       | no                      | 58           | 7(3+4)  | white           | P           |
| tcga-ch-5752 | <i>RAD51C</i> | p.F32Sfs*8    | NM_058216.2:c.93del      | no                      | 66           | 8(4+4)  | white           | P           |
| tcga-ch-5792 | <i>RAD51D</i> | p.W72*        | NM_001142571:c.216G>A    | LOH likely (copy loss)  | 57           | 9(4+5)  | white           | P           |

\*Variant classification according to ACMG/AMP guidelines, P= pathogenic, LP= likely pathogenic

**Table S3:** Detailed Demographics of Each Series

| Series     | ID       | Germline mutation | Age of Onset | Race/Ethnicity | Gleason | Prostate Cancer 1st Degree | Prostate Cancer >1st Degree | Cancer Other 1st Degree | Cancer Other >1st Degree | Other Cancers                  |
|------------|----------|-------------------|--------------|----------------|---------|----------------------------|-----------------------------|-------------------------|--------------------------|--------------------------------|
| 1_SU2C-PCF | MO_1124  | 1                 | 42           | white          | Unk     | 1                          | 1                           | 1                       | 1                        | colon and breast, hodgkin      |
| 1_SU2C-PCF | MO_1071  | 1                 | 49           | white          | Unk     | 0                          | 0                           | 1                       | 1                        | breast, breast                 |
| 1_SU2C-PCF | MO_1013  | 1                 | 50           | white          | 8(4+4)  | 0                          | 0                           | 1                       | 0                        | pancreatic, leukemia           |
| 1_SU2C-PCF | MO_1221  | 1                 | 50           | white          | 9(4+5)  | 1                          | 0                           | 1                       | 1                        | unknown                        |
| 1_SU2C-PCF | SC_9059  | 1                 | 51           | white          | 8(4+4)  | 0                          | 0                           | 1                       | 0                        | nos                            |
| 1_SU2C-PCF | SC_9083  | 1                 | 53           | white          | 8(5+3)  | 1                          | 1                           | 1                       | 1                        | breast, brain                  |
| 1_SU2C-PCF | MO_1176  | 1                 | 55           | white          | 10(5+5) | 0                          | 0                           | 1                       | 0                        | breast and ovary               |
| 1_SU2C-PCF | SC_9022  | 1                 | 57           | white          | 7(4+3)  | Unk                        | Unk                         | Unk                     | Unk                      | unknown                        |
| 1_SU2C-PCF | MO_1232  | 1                 | 61           | white          | 9(4+5)  | 0                          | 0                           | 1                       | 0                        | breast, colon, CLL             |
| 1_SU2C-PCF | SC_9072  | 1                 | 61           | black          | Unk     | 0                          | 0                           | 0                       | 0                        |                                |
| 1_SU2C-PCF | SM-67ES4 | 1                 | 64           | white          | 9(4+5)  | 0                          | 0                           | 1                       | 0                        | GI, lung                       |
| 1_SU2C-PCF | SC_9076  | 1                 | 65           | asian          | 8(4+4)  | 0                          | 0                           | 0                       | 0                        |                                |
| 1_SU2C-PCF | SC_9061  | 1                 | 66           | white          | 9(4+5)  | 1                          | 1                           | 0                       | 1                        | nos                            |
| 1_SU2C-PCF | TP_2054  | 1                 | 67           | Unk            | 10(5+5) | Unk                        | Unk                         | Unk                     | Unk                      | unknown                        |
| 1_SU2C-PCF | SC_9090  | 1                 | 72           | white          | 8(4+4)  | 0                          | 0                           | 1                       | 0                        | lung                           |
| 1_SU2C-PCF | SC_9010  | 0                 | Unk          | Unk            | Unk     | Unk                        | Unk                         | Unk                     | Unk                      | unknown                        |
| 1_SU2C-PCF | SC_9008  | 0                 | Unk          | Unk            | Unk     | Unk                        | Unk                         | Unk                     | Unk                      | unknown                        |
| 1_SU2C-PCF | SC_9009  | 0                 | Unk          | Unk            | Unk     | Unk                        | Unk                         | Unk                     | Unk                      | unknown                        |
| 1_SU2C-PCF | SC_9001  | 0                 | 43           | black          | 9(5+4)  | 0                          | 0                           | 0                       | 0                        |                                |
| 1_SU2C-PCF | SC_9003  | 0                 | 60           | white          | 9(4+5)  | 0                          | 0                           | 0                       | 0                        |                                |
| 1_SU2C-PCF | SC_9007  | 0                 | 50           | white          | 7(4+3)  | 0                          | 0                           | 0                       | 0                        |                                |
| 1_SU2C-PCF | SC_9019  | 0                 | 75           | white          | 6(3+3)  | 0                          | 1                           | 0                       | 0                        | bladder                        |
| 1_SU2C-PCF | SC_9012  | 0                 | 67           | white          | 8(4+4)  | 0                          | 1                           | 1                       | 0                        | breast and uterine             |
| 1_SU2C-PCF | SC_9011  | 0                 | 67           | white          | 7(3+4)  | 0                          | 0                           | 1                       | 0                        | nos                            |
| 1_SU2C-PCF | SC_9020  | 0                 | 69           | white          | 7(3+4)  | 0                          | 0                           | 1                       | 0                        | ovary                          |
| 1_SU2C-PCF | SC_9021  | 0                 | 53           | white          | 7(3+4)  | 0                          | 0                           | 0                       | 1                        | pancreatic                     |
| 1_SU2C-PCF | SC_9016  | 0                 | 61           | white          | 6(3+3)  | 0                          | 0                           | 0                       | 0                        |                                |
| 1_SU2C-PCF | SC_9005  | 0                 | 66           | white          | 7(3+4)  | 0                          | 0                           | 0                       | 0                        |                                |
| 1_SU2C-PCF | SC_9018  | 0                 | 62           | white          | 8(4+4)  | 0                          | 0                           | 1                       | 1                        | kidney, liver                  |
| 1_SU2C-PCF | SC_9017  | 0                 | 65           | white          | 9(4+5)  | 0                          | 0                           | 0                       | 0                        |                                |
| 1_SU2C-PCF | SC_9027  | 0                 | 49           | white          | 6(3+3)  | 0                          | 0                           | 1                       | 0                        | lung, throat                   |
| 1_SU2C-PCF | SC_9026  | 0                 | 62           | white          | Unk     | 0                          | 1                           | 1                       | 1                        | male breast, colon, lung, bone |
| 1_SU2C-PCF | SC_9028  | 0                 | 65           | white          | 9(4+5)  | 0                          | 0                           | 1                       | 0                        | lung, lung                     |
| 1_SU2C-PCF | SC_9029  | 0                 | 61           | white          | 7(4+3)  | 0                          | 0                           | 0                       | 1                        | lung                           |
| 1_SU2C-PCF | SC_9032  | 0                 | 69           | white          | 6(3+3)  | 0                          | 0                           | 1                       | 0                        | breast                         |
| 1_SU2C-PCF | SC_9035  | 0                 | 69           | white          | 9(5+4)  | 1                          | 0                           | 0                       | 0                        |                                |
| 1_SU2C-PCF | SC_9034  | 0                 | 65           | white          | 9(5+4)  | 0                          | 0                           | 1                       | 0                        | melanoma                       |
| 1_SU2C-PCF | SC_9036  | 0                 | 71           | white          | 8(4+4)  | 1                          | 0                           | 0                       | 0                        | prostate                       |
| 1_SU2C-PCF | SC_9038  | 0                 | 64           | white          | 8(4+4)  | 1                          | 0                           | 0                       | 0                        | prostate                       |
| 1_SU2C-PCF | SC_9037  | 0                 | 63           | white          | 9(4+5)  | 0                          | 0                           | 0                       | 0                        |                                |
| 1_SU2C-PCF | SC_9039  | 0                 | 64           | Unk            | 9(5+4)  | 1                          | 0                           | 0                       | 0                        | prostate                       |
| 1_SU2C-PCF | SC_9043  | 0                 | 59           | white          | 7(4+3)  | 0                          | 0                           | 0                       | 0                        |                                |
| 1_SU2C-PCF | SC_9050  | 0                 | 63           | white          | 6       | 0                          | 0                           | 1                       | 0                        | colon                          |
| 1_SU2C-PCF | SC_9054  | 0                 | 71           | white          | 10(5+5) | 0                          | 0                           | 0                       | 0                        |                                |
| 1_SU2C-PCF | SC_9056  | 0                 | 58           | white          | 7(4+3)  | 0                          | 0                           | 0                       | 0                        |                                |
| 1_SU2C-PCF | SC_9055  | 0                 | 54           | white          | 9(4+5)  | 0                          | 0                           | 0                       | 1                        | lymphoma                       |
| 1_SU2C-PCF | SC_9080  | 0                 | 72           | white          | 8(4+4)  | 1                          | 0                           | 1                       | 0                        | colon                          |
| 1_SU2C-PCF | SC_9066  | 0                 | 43           | hispanic       | Unk     | 1                          | 1                           | 0                       | 1                        | uterine, brain                 |
| 1_SU2C-PCF | SC_9065  | 0                 | 76           | white          | 7(4+3)  | 0                          | 0                           | 0                       | 0                        |                                |
| 1_SU2C-PCF | SC_9068  | 0                 | 70           | white          | 7(4+3)  | 0                          | 0                           | 1                       | 0                        | pancreatic, bladder            |
| 1_SU2C-PCF | SC_9081  | 0                 | 62           | white          | 7(3+4)  | 0                          | 0                           | 1                       | 0                        | skin                           |
| 1_SU2C-PCF | SC_9082  | 0                 | 65           | white          | 9(4+5)  | 0                          | 0                           | 0                       | 0                        |                                |
| 1_SU2C-PCF | SC_9073  | 0                 | 62           | white          | 9(unk)  | 0                          | 0                           | 0                       | 0                        |                                |
| 1_SU2C-PCF | SC_9089  | 0                 | 48           | white          | 7(4+3)  | 0                          | 0                           | 0                       | 1                        | breast, breast, breast         |
| 1_SU2C-PCF | SC_9092  | 0                 | 69           | white          | 7(4+3)  | 0                          | 0                           | 1                       | 0                        | lung                           |
| 1_SU2C-PCF | SC_9084  | 0                 | 61           | white          | 10(5+5) | 0                          | 1                           | 0                       | 0                        |                                |
| 1_SU2C-PCF | SC_9086  | 0                 | 61           | white          | 9(4+5)  | 1                          | 1                           | 0                       | 0                        |                                |
| 1_SU2C-PCF | SC_9023  | 0                 | 68           | white          | 9(4+5)  | 0                          | 0                           | 1                       | 0                        | nos                            |



|            |          |   |     |       |         |     |     |     |     |                                      |
|------------|----------|---|-----|-------|---------|-----|-----|-----|-----|--------------------------------------|
| 1_SU2C-PCF | SC_9024  | 0 | 60  | white | 8(3+5)  | 0   | 0   | 1   | 0   | nos                                  |
| 1_SU2C-PCF | SC_9030  | 0 | 57  | white | 10(5+5) | 0   | 0   | 0   | 0   |                                      |
| 1_SU2C-PCF | SC_9031  | 0 | 39  | black | 7(3+4)  | 0   | 0   | 0   | 0   |                                      |
| 1_SU2C-PCF | SC_9046  | 0 | 60  | white | 8(3+5)  | 0   | 0   | 0   | 0   |                                      |
| 1_SU2C-PCF | SC_9047  | 0 | 71  | white | Unk     | 0   | 0   | 0   | 0   |                                      |
| 1_SU2C-PCF | SC_9048  | 0 | 61  | white | 9(4+5)  | 0   | 0   | 1   | 0   | breast                               |
| 1_SU2C-PCF | SC_9049  | 0 | 68  | white | 8(4+4)  | 0   | 0   | 1   | 0   | nos                                  |
| 1_SU2C-PCF | SC_9058  | 0 | 68  | white | 9(4+5)  | 0   | 0   | 0   | 0   |                                      |
| 1_SU2C-PCF | SC_9060  | 0 | 63  | asian | 8(3+5)  | 1   | 0   | 1   | 0   | nos                                  |
| 1_SU2C-PCF | SC_9057  | 0 | 55  | white | 9(4+5)  | 0   | 0   | 0   | 0   |                                      |
| 1_SU2C-PCF | SC_9062  | 0 | 50  | white | 9(5+4)  | 0   | 0   | 1   | 0   | nos                                  |
| 1_SU2C-PCF | SC_9063  | 0 | 59  | white | 6(3+3)  | 0   | 0   | 0   | 0   |                                      |
| 1_SU2C-PCF | SC_9071  | 0 | 53  | white | 7(4+3)  | 0   | 0   | 0   | 0   |                                      |
| 1_SU2C-PCF | SC_9094  | 0 | 55  | white | 9(4+5)  | 1   | 0   | 0   | 0   |                                      |
| 1_SU2C-PCF | SC_9096  | 0 | 81  | white | 10(5+5) | Unk | Unk | Unk | Unk | unknown                              |
| 1_SU2C-PCF | SC_9097  | 0 | 67  | white | 9(5+4)  | 0   | 0   | 0   | 0   |                                      |
| 1_SU2C-PCF | SC_9099  | 0 | 68  | white | 7(3+4)  | 0   | 0   | 0   | 1   | nos                                  |
| 1_SU2C-PCF | SC_9100  | 0 | 74  | white | 7(3+4)  | Unk | Unk | Unk | Unk | unknown                              |
| 1_SU2C-PCF | SC_9103  | 0 | 60  | white | 7(3+4)  | 0   | 0   | 0   | 0   |                                      |
| 1_SU2C-PCF | SC_9104  | 0 | 61  | white | Unk     | 1   | 0   | 0   | 0   |                                      |
| 1_SU2C-PCF | SC_9107  | 0 | 59  | white | 9(4+5)  | 0   | 0   | 1   | 1   | nos                                  |
| 1_SU2C-PCF | SC_9109  | 0 | 49  | white | 9(4+5)  | 1   | 1   | 0   | 0   | prostate, prostate                   |
| 1_SU2C-PCF | MO_1012  | 0 | 64  | white | 7(3+4)  | 0   | 0   | 1   | 0   | colon                                |
| 1_SU2C-PCF | MO_1014  | 0 | 61  | white | 8(4+4)  | 0   | 0   | 0   | 0   |                                      |
| 1_SU2C-PCF | SM-4W2N9 | 0 | 59  | white | Unk     | 0   | 0   | 0   | 0   |                                      |
| 1_SU2C-PCF | SM-4W2NA | 0 | 72  | white | 9(4+5)  | 0   | 0   | 1   | 0   | colon, ovary                         |
| 1_SU2C-PCF | SM-4W2NC | 0 | 55  | white | 7(4+3)  | 0   | 0   | 1   | 0   | gastric, gastric and colon           |
| 1_SU2C-PCF | SM-4W2ND | 0 | 66  | white | 9(4+5)  | 0   | 0   | 1   | 1   | ovary, ovary, brain                  |
| 1_SU2C-PCF | SM-4W2NG | 0 | 50  | white | 7(4+3)  | 1   | 1   | 1   | 0   | breast                               |
| 1_SU2C-PCF | SM-4W2NH | 0 | 53  | white | 9(4+5)  | 1   | 1   | 0   | 0   |                                      |
| 1_SU2C-PCF | SM-4W2NI | 0 | 54  | white | 8(4+4)  | 0   | 0   | 0   | 1   | throat, throat                       |
| 1_SU2C-PCF | SM-67ERS | 0 | 55  | white | 7(unk)  | 1   | 0   | 1   | 0   | breast                               |
| 1_SU2C-PCF | SM-67ERT | 0 | 72  | white | 7(3+4)  | 1   | 0   | 0   | 0   |                                      |
| 1_SU2C-PCF | SM-67ERU | 0 | 63  | white | 8(4+4)  | 0   | 0   | 0   | 0   |                                      |
| 1_SU2C-PCF | SM-67ERW | 0 | 67  | black | Unk     | 1   | 0   | 1   | 0   | brain                                |
| 1_SU2C-PCF | SM-67ERX | 0 | 56  | white | 9(4+5)  | 0   | 0   | 1   | 0   | colon, colon                         |
| 1_SU2C-PCF | SM-67ERZ | 0 | Unk | white | Unk     | 0   | 0   | 0   | 0   |                                      |
| 1_SU2C-PCF | SM-67ES1 | 0 | 65  | Unk   | Unk     | 0   | 0   | 1   | 1   | ocular, colon, breast                |
| 1_SU2C-PCF | SM-67ES2 | 0 | 51  | white | 7(4+3)  | 0   | 0   | 0   | 1   | gastric                              |
| 1_SU2C-PCF | SM-67ES6 | 0 | 69  | white | 9(5+4)  | 0   | 0   | 1   | 0   | breast                               |
| 1_SU2C-PCF | MO_1008  | 0 | 45  | white | 8(4+4)  | Unk | Unk | Unk | Unk | unknown                              |
| 1_SU2C-PCF | MO_1015  | 0 | 65  | white | 8(4+4)  | 0   | 1   | 0   | 1   | nos                                  |
| 1_SU2C-PCF | MO_1020  | 0 | 61  | white | 8(4+4)  | 0   | 0   | 1   | 1   | breast, bladder, nos                 |
| 1_SU2C-PCF | MO_1040  | 0 | 51  | white | 7(unk)  | 0   | 1   | 0   | 0   | prostate                             |
| 1_SU2C-PCF | MO_1054  | 0 | 45  | white | 9(unk)  | 0   | 0   | 0   | 1   | breast                               |
| 1_SU2C-PCF | MO_1074  | 0 | 58  | white | 7(4+3)  | 0   | 0   | 0   | 1   | leukemia                             |
| 1_SU2C-PCF | MO_1084  | 0 | 63  | white | 6(3+3)  | 0   | 0   | 1   | 1   | colon, lung, nos, gyn nos, gyn nos   |
| 1_SU2C-PCF | MO_1094  | 0 | 66  | white | 9(5+4)  | 1   | 0   | 1   | 0   | ovary, endometrial, leukemia         |
| 1_SU2C-PCF | MO_1095  | 0 | 70  | white | 9(4+5)  | 1   | 0   | 1   | 0   | colon and prostate, lung             |
| 1_SU2C-PCF | TP_2001  | 0 | 67  | white | 9(+)    | Unk | Unk | Unk | Unk | unknown                              |
| 1_SU2C-PCF | TP_2009  | 0 | 56  | white | 9(4+5)  | Unk | Unk | Unk | Unk | unknown                              |
| 1_SU2C-PCF | TP_2010  | 0 | 59  | white | 9(5+4)  | Unk | Unk | Unk | Unk | unknown                              |
| 1_SU2C-PCF | MO_1114  | 0 | 53  | white | 7(unk)  | 0   | 1   | 0   | 1   | breast                               |
| 1_SU2C-PCF | MO_1128  | 0 | 60  | white | 7(4+3)  | 1   | 0   | 1   | 1   | bladder, throat                      |
| 1_SU2C-PCF | MO_1130  | 0 | 53  | white | 7(3+4)  | 1   | 0   | 1   | 1   | colon, breast, lymphoma, breast, nos |
| 1_SU2C-PCF | TP_2032  | 0 | 60  | white | Unk     | Unk | Unk | Unk | Unk | unknown                              |
| 1_SU2C-PCF | MO_1096  | 0 | 57  | black | 8(4+4)  | 0   | 0   | 1   | 0   | colon                                |
| 1_SU2C-PCF | TP_2020  | 0 | 52  | white | Unk     | Unk | Unk | Unk | Unk | unknown                              |
| 1_SU2C-PCF | MO_1192  | 0 | 56  | black | 8(unk)  | 1   | 0   | 0   | 0   | prostate, prostate, prostate         |
| 1_SU2C-PCF | MO_1179  | 0 | 70  | white | 9(4+5)  | 0   | 0   | 1   | 1   | mesothelioma, bladder, lung          |

|            |          |   |     |          |         |     |     |     |     |                                                        |
|------------|----------|---|-----|----------|---------|-----|-----|-----|-----|--------------------------------------------------------|
| 1_SU2C-PCF | MO_1184  | 0 | 67  | white    | 9(4+5)  | 0   | 0   | 1   | 1   | lung, esophageal, nos, lung                            |
| 1_SU2C-PCF | MO_1162  | 0 | 40  | white    | 8(4+4)  | 1   | 0   | 0   | 1   | breast, nos                                            |
| 1_SU2C-PCF | MO_1215  | 0 | 54  | white    | 7(4+3)  | 0   | 0   | 0   | 1   | leukemia, leukemia                                     |
| 1_SU2C-PCF | MO_1241  | 0 | 75  | white    | 10(5+5) | 0   | 0   | 1   | 1   | cervical,breast                                        |
| 1_SU2C-PCF | MO_1262  | 0 | 47  | black    | 7(3+4)  | 1   | 0   | 0   | 1   | nos, nos                                               |
| 1_SU2C-PCF | MO_1202  | 0 | 68  | white    | 7(3+4)  | 0   | 0   | 1   | 1   | ovary and melanoma, lung, mesothelioma, thyroid, ovary |
| 1_SU2C-PCF | MO_1244  | 0 | 56  | white    | 9(5+4)  | 0   | 0   | 1   | 0   | breast                                                 |
| 1_SU2C-PCF | MO_1249  | 0 | 50  | white    | Unk     | 1   | 0   | 0   | 1   | nos, breast                                            |
| 1_SU2C-PCF | MO_1263  | 0 | 55  | white    | 9(5+4)  | 0   | 0   | 0   | 0   |                                                        |
| 1_SU2C-PCF | TP_2034  | 0 | 50  | asian    | 9(4+5)  | Unk | Unk | Unk | Unk | unknown                                                |
| 1_SU2C-PCF | MO_1219  | 0 | 66  | white    | 7(4+3)  | 0   | 0   | 1   | 0   | colon                                                  |
| 1_SU2C-PCF | MO_1337  | 0 | 61  | white    | 7(4+3)  | 0   | 0   | 1   | 0   | lung, colon                                            |
| 1_SU2C-PCF | MO_1316  | 0 | 55  | white    | 6(4+2)  | 0   | 1   | 1   | 1   | endometrial, colon, colon                              |
| 1_SU2C-PCF | MO_1118  | 0 | 69  | white    | 9(4+5)  | 1   | 0   | 1   | 0   | lymphoma, colon, breast, skin                          |
| 1_SU2C-PCF | MO_1161  | 0 | 64  | white    | 10(5+5) | 1   | 0   | 0   | 1   | nos, nos                                               |
| 1_SU2C-PCF | MO_1336  | 0 | 58  | white    | 6(3+3)  | 0   | 0   | 1   | 1   | colon, lymphoma, ovary                                 |
| 1_SU2C-PCF | MO_1277  | 0 | 46  | white    | 8(4+4)  | 0   | 1   | 1   | 0   | bladder, colon                                         |
| 1_SU2C-PCF | TP_2060  | 0 | 71  | Unk      | 10(5+5) | Unk | Unk | Unk | Unk | unknown                                                |
| 1_SU2C-PCF | MO_1339  | 0 | 77  | white    | 8(4+4)  | 1   | 1   | 1   | 0   | melanoma                                               |
| 1_SU2C-PCF | TP_2061  | 0 | 60  | Unk      | 9(4+5)  | Unk | Unk | Unk | Unk | unknown                                                |
| 1_SU2C-PCF | TP_2064  | 0 | 63  | Unk      | 7(3+4)  | Unk | Unk | Unk | Unk | unknown                                                |
| 1_SU2C-PCF | MO_1410  | 0 | 63  | white    | 8(4+4)  | 1   | 1   | 0   | 0   |                                                        |
| 1_SU2C-PCF | SC_9091  | 0 | 59  | black    | Unk     | 0   | 0   | 1   | 1   | lung, breast, colon                                    |
| 1_SU2C-PCF | SC_9093  | 0 | 54  | black    | 10(5+5) | 0   | 0   | 1   | 0   | colon and ovary                                        |
| 1_SU2C-PCF | SM-581SR | 0 | 40  | white    | 6(3+3)  | 0   | 0   | 0   | 1   | breast                                                 |
| 1_SU2C-PCF | SM-5EEBM | 0 | 45  | white    | Unk     | 0   | 0   | 1   | 0   | colon, non-Hodgkin's lymphoma                          |
| 1_SU2C-PCF | SM-5EEBN | 0 | 66  | white    | 7(4+3)  | 0   | 0   | 0   | 0   |                                                        |
| 1_SU2C-PCF | SM-5EEBO | 0 | 63  | white    | 7(3+4)  | 0   | 0   | 1   | 0   | abdominal cancer nos                                   |
| 1_SU2C-PCF | SM-5SGU1 | 0 | 65  | white    | 9(4+5)  | 0   | 0   | 0   | 0   |                                                        |
| 1_SU2C-PCF | SM-5SGU3 | 0 | 56  | white    | 6(3+3)  | 1   | 0   | 0   | 0   |                                                        |
| 1_SU2C-PCF | SM-5SGU5 | 0 | 49  | white    | 8(4+4)  | 1   | 0   | 0   | 0   |                                                        |
| 1_SU2C-PCF | SM-5SGU6 | 0 | 63  | white    | 8(4+4)  | 1   | 1   | 1   | 0   | lung                                                   |
| 2_SU2C-PCF | SC_9004  | 1 | 55  | white    | 9(4+5)  | 0   | 0   | 1   | 0   | cervical                                               |
| 2_SU2C-PCF | SC_9025  | 1 | 54  | white    | 7(4+3)  | 0   | 0   | 0   | 0   | breast                                                 |
| 2_SU2C-PCF | SC_9079  | 1 | 55  | white    | Unk     | 0   | 0   | 1   | 0   | bone                                                   |
| 2_SU2C-PCF | SC_9085  | 1 | 62  | white    | Unk     | 0   | 0   | 1   | 1   | breast and ovary                                       |
| 2_SU2C-PCF | SC_9137  | 1 | 64  | white    | 7(4+3)  | 1   | 0   | 0   | 0   |                                                        |
| 2_SU2C-PCF | SM-4JC6B | 1 | 61  | hispanic | 8(4+4)  | 1   | 1   | 0   | 0   | prostate in father, paternal grandfather               |
| 2_SU2C-PCF | SM-5CQ5A | 1 | 57  | white    | 9(4+5)  | 0   | 0   | 0   | 0   |                                                        |
| 2_SU2C-PCF | SM-7LGUA | 1 | 73  | white    | 7(3+4)  | 1   | 0   | 1   | 0   | breast                                                 |
| 2_SU2C-PCF | TP_2077  | 1 | Unk | Unk      | Unk     | Unk | Unk | Unk | Unk | unknown                                                |
| 2_SU2C-PCF | SC_9002  | 0 | 79  | white    | Unk     | 0   | 0   | 0   | 0   |                                                        |
| 2_SU2C-PCF | SC_9006  | 0 | 77  | white    | 10(5+5) | 0   | 0   | 1   | 0   | esophageal                                             |
| 2_SU2C-PCF | SC_9033  | 0 | 59  | white    | 7(3+4)  | 0   | 0   | 1   | 0   | colon                                                  |
| 2_SU2C-PCF | SC_9040  | 0 | 70  | Unk      | 7(4+3)  | 0   | 0   | 1   | 0   | lung                                                   |
| 2_SU2C-PCF | SC_9041  | 0 | 57  | white    | 8(4+4)  | 0   | 0   | 1   | 0   | colon                                                  |
| 2_SU2C-PCF | SC_9042  | 0 | 73  | white    | 7(4+3)  | 0   | 0   | 1   | 0   | nos                                                    |
| 2_SU2C-PCF | SC_9064  | 0 | 56  | white    | 8(4+4)  | 0   | 0   | 0   | 0   |                                                        |
| 2_SU2C-PCF | SC_9053  | 0 | 56  | white    | 8(5+3)  | 0   | 0   | 0   | 0   |                                                        |
| 2_SU2C-PCF | SC_9136  | 0 | 68  | white    | 7(4+3)  | 0   | 0   | 1   | 0   | bladder, breast                                        |
| 2_SU2C-PCF | SC_9087  | 0 | 56  | Unk      | 7(3+4)  | 0   | 0   | 1   | 0   | kidney                                                 |
| 2_SU2C-PCF | SC_9088  | 0 | 68  | Unk      | 7(4+3)  | 0   | 0   | 0   | 0   |                                                        |
| 2_SU2C-PCF | SC_9121  | 0 | 42  | black    | 10(5+5) | 0   | 0   | 0   | 0   |                                                        |
| 2_SU2C-PCF | SC_9123  | 0 | 64  | black    | 9(4+5)  | 0   | 0   | 0   | 1   | head and neck                                          |
| 2_SU2C-PCF | SC_9132  | 0 | 59  | white    | 8(4+4)  | 0   | 1   | 1   | 0   | cervical                                               |
| 2_SU2C-PCF | SC_9138  | 0 | 46  | white    | 9(4+5)  | 0   | 0   | 0   | 1   | colon                                                  |
| 2_SU2C-PCF | SC_9126  | 0 | Unk | white    | Unk     | Unk | Unk | Unk | Unk | unknown                                                |

|            |          |   |     |       |             |     |     |     |     |                                                      |
|------------|----------|---|-----|-------|-------------|-----|-----|-----|-----|------------------------------------------------------|
| 2_SU2C-PCF | SM-4W2NB | 0 | Unk | white | 7(4+3)      | 0   | 0   | 1   | 0   | bladder                                              |
| 2_SU2C-PCF | SM-4W2NE | 0 | 83  | white | 8(4+4)      | 1   | 0   | 1   | 0   | thyroid                                              |
| 2_SU2C-PCF | SM-4W2NF | 0 | 64  | white | 9(4+5)      | 0   | 0   | 1   | 0   | colon                                                |
| 2_SU2C-PCF | SM-7LGU3 | 0 | 52  | white | 8(4+4)      | 0   | 0   | 1   | 0   | fallopian tube                                       |
| 2_SU2C-PCF | SM-7LGU5 | 0 | 59  | white | 8(4+4)      | 0   | 1   | 1   | 1   | lung, colon, colon, lung                             |
| 2_SU2C-PCF | SM-7LGU6 | 0 | 58  | asian | 7(3+4)      | 0   | 0   | 0   | 0   |                                                      |
| 2_SU2C-PCF | SM-7LGU7 | 0 | 60  | white | Unk         | 0   | 0   | 1   | 1   | skin, breast and colon, ovary                        |
| 2_SU2C-PCF | SM-7LGU9 | 0 | 74  | white | 9(5+4)      | 0   | 0   | 1   | 0   | nos                                                  |
| 2_SU2C-PCF | SM-7LGUB | 0 | 79  | white | 9(4+5)      | 0   | 0   | 0   | 1   | brain, breast                                        |
| 2_SU2C-PCF | SM-7LGUC | 0 | 54  | white | 7(3+4)      | 1   | 0   | 0   | 1   | ovary                                                |
| 2_SU2C-PCF | SM-7LGUD | 0 | 58  | white | 7(3+4)      | 0   | 0   | 0   | 0   |                                                      |
| 2_SU2C-PCF | SM-7LGUE | 0 | 61  | white | 7(3+4)      | 0   | 0   | 1   | 0   | lymphoma                                             |
| 2_SU2C-PCF | SM-7LGUF | 0 | 65  | white | 10(5+5)     | 1   | 0   | 0   | 1   | leukemia                                             |
| 2_SU2C-PCF | SM-7LGUG | 0 | 64  | white | 9(4+5)      | 0   | 0   | 0   | 0   |                                                      |
| 2_SU2C-PCF | SM-7LGUH | 0 | 59  | white | 8(4+4)      | 0   | 0   | 0   | 0   |                                                      |
| 2_SU2C-PCF | SM-7LGUI | 0 | 53  | white | 7(3+4)      | 0   | 0   | 1   | 0   | lung, breast and colon and liver                     |
| 2_SU2C-PCF | SM-7LGUJ | 0 | Unk | white | Unk         | 1   | 0   | 1   | 0   | reproductive tract                                   |
| 2_SU2C-PCF | SM-7LGUL | 0 | 53  | white | 9(4+5)      | 0   | 1   | 1   | 0   | breast                                               |
| 2_SU2C-PCF | SM-7LGUM | 0 | 63  | white | 9(5+4)      | 0   | 0   | 0   | 0   |                                                      |
| 2_SU2C-PCF | SM-7LGUO | 0 | 84  | white | 10(5+5)     | 0   | 0   | 1   | 0   | colon and gastric                                    |
| 2_SU2C-PCF | SM-7LGUP | 0 | Unk | Unk   | Unk         | 0   | 1   | 1   | 0   | laryngeal                                            |
| 2_SU2C-PCF | SM-7LGUQ | 0 | 62  | white | 9(4+5)      | 0   | 0   | 1   | 0   | leukemia                                             |
| 2_SU2C-PCF | MO_1021  | 0 | 55  | white | 9(5+4)      | 0   | 0   | 0   | 1   | pancreatic                                           |
| 2_SU2C-PCF | MO_1105  | 0 | 59  | white | 10(5+5)     | 0   | 0   | 0   | 1   | breast                                               |
| 2_SU2C-PCF | MO_1139  | 0 | 52  | white | 8(4+4)      | 0   | 0   | 1   | 1   | breast, leukemia                                     |
| 2_SU2C-PCF | MO_1132  | 0 | 60  | white | 9(5+4)      | 1   | 0   | 0   | 0   |                                                      |
| 2_SU2C-PCF | TP_2069  | 0 | 63  | Unk   | 9(4+5)      | Unk | Unk | Unk | Unk | unknown                                              |
| 2_SU2C-PCF | MO_1420  | 0 | 60  | white | 9(4+5)      | 0   | 0   | 1   | 0   | breast, brain, multiple myeloma                      |
| 2_SU2C-PCF | MO_1421  | 0 | 54  | white | 9(4+5)      | 0   | 1   | 1   | 1   | prostate, prostate, lymphoma, ovary, nos, esophageal |
| 2_SU2C-PCF | MO_1447  | 0 | 57  | white | 9(4+5)      | 0   | 1   | 1   | 1   | nos, breast, lung                                    |
| 2_SU2C-PCF | TP_2078  | 0 | Unk | Unk   | Unk         | Unk | Unk | Unk | Unk | unknown                                              |
| 2_SU2C-PCF | TP_2079  | 0 | Unk | Unk   | Unk         | Unk | Unk | Unk | Unk | unknown                                              |
| 2_SU2C-PCF | SC_9134  | 0 | 58  | black | Unk         | 1   | 0   | 1   | 0   | colon, throat                                        |
| 2_SU2C-PCF | SC_9142  | 0 | 56  | black | 9(4+5)      | 0   | 0   | 0   | 0   |                                                      |
| 2_SU2C-PCF | SM-42W9A | 0 | 71  | Unk   | 8(4+4)      | 1   | 0   | 0   | 0   |                                                      |
| 2_SU2C-PCF | SM-4JC6D | 0 | 59  | white | Unk         | 0   | 0   | 1   | 0   | ovary                                                |
| 2_SU2C-PCF | SM-4JC6K | 0 | 61  | white | 6(3+3)      | 0   | 0   | 1   | 0   | esophageal                                           |
| 2_SU2C-PCF | SM-4JC6P | 0 | 64  | white | 9(4+5)      | 1   | 0   | 0   | 0   |                                                      |
| 2_SU2C-PCF | SM-4JC6Z | 0 | 64  | white | 7(4+3)      | 0   | 1   | 0   | 0   |                                                      |
| 2_SU2C-PCF | SM-6WZF3 | 0 | 59  | white | 9(4+5)      | 0   | 0   | 0   | 0   |                                                      |
| 2_SU2C-PCF | SM-6VZ7K | 0 | 71  | white | 9-10(5+4-5) | 0   | 0   | 1   | 0   | lung, lung                                           |
| 2_SU2C-PCF | SM-6WZF8 | 0 | 56  | white | 9(5+4)      | 1   | 0   | 0   | 0   |                                                      |
| 2_SU2C-PCF | SM-6WZF9 | 0 | 69  | white | 8(4+4)      | 0   | 0   | 1   | 0   | gastric                                              |
| 2_SU2C-PCF | SM-6WZFA | 0 | 67  | white | Unk         | 0   | 0   | 0   | 0   |                                                      |
| 2_SU2C-PCF | SM-6WZFB | 0 | 76  | white | 10(5+5)     | 0   | 0   | 1   | 0   | breast, lung                                         |
| 2_SU2C-PCF | SM-6WZF6 | 0 | 72  | white | Unk         | 0   | 0   | 0   | 0   |                                                      |
| 2_SU2C-PCF | SM-581SL | 0 | 62  | white | 10(5+5)     | 0   | 0   | 0   | 1   | GU malignancy                                        |
| 2_SU2C-PCF | SM-5CQ5D | 0 | 56  | white | 6(3+3)      | 1   | 0   | 0   | 1   | nos                                                  |
| 2_SU2C-PCF | SM-5CQ5F | 0 | 66  | white | 9(4+5)      | 0   | 0   | 1   | 0   | bladder, colon and pancreatic                        |
| 2_SU2C-PCF | SM-5CQ5K | 0 | 68  | asian | 9(5+4)      | 0   | 0   | 0   | 0   |                                                      |
| 2_SU2C-PCF | SM-5CQ4T | 0 | 53  | white | 8(3+5)      | Unk | Unk | Unk | Unk | unknown                                              |
| 2_SU2C-PCF | SM-5CQ4Y | 0 | 59  | white | 9(4+5)      | 0   | 0   | 0   | 0   |                                                      |
| 2_SU2C-PCF | SM-5CQ4Z | 0 | 59  | white | 7(4+3)      | 1   | 0   | 0   | 0   |                                                      |
| 2_SU2C-PCF | SM-5CQ55 | 0 | 56  | white | 7(3+4)      | 0   | 0   | 0   | 0   |                                                      |
| 2_SU2C-PCF | SM-6VZ7L | 0 | 64  | white | 9(4+5)      | 0   | 0   | 0   | 0   |                                                      |
| 2_SU2C-PCF | SM-6VZ7N | 0 | 68  | white | 6(3+3)      | 0   | 0   | 1   | 0   | acoustic neuro-ma                                    |
| 2_SU2C-PCF | SM-6VZ7M | 0 | 68  | white | Unk         | 0   | 0   | 0   | 0   |                                                      |
| 2_SU2C-PCF | PM15     | 0 | 70  | mixed | 10(5+5)     | 0   | 0   | 1   | 1   | colorectal, pancreatic and brain                     |
| 2_SU2C-PCF | PM161    | 0 | 56  | white | 7(3+4)      | 0   | 0   | 0   | 0   |                                                      |
| 3_RMh      | RM003    | 1 | 60  | white | 10          | 0   | 0   | 0   | 0   |                                                      |

|       |       |   |    |       |        |     |     |     |     |                     |
|-------|-------|---|----|-------|--------|-----|-----|-----|-----|---------------------|
| 3_RMH | RM169 | 1 | 61 | white | Unk    | Unk | Unk | Unk | Unk |                     |
| 3_RMH | RM037 | 1 | 68 | white | 9      | 0   | 0   | 1   | 0   | nos                 |
| 3_RMH | RM047 | 1 | 61 | white | 9      | 0   | 0   | 0   | 0   |                     |
| 3_RMH | RM049 | 1 | 55 | white | Unk    | 0   | 0   | 1   | 0   | gastric             |
| 3_RMH | RM061 | 1 | 63 | white | 9      | Unk | Unk | Unk | Unk |                     |
| 3_RMH | RM072 | 1 | 53 | white | 7(4+3) | 0   | 0   | 1   | 0   | nos                 |
| 3_RMH | RM077 | 1 | 63 | white | Unk    | 0   | 0   | 1   | 1   | breast, ovary       |
| 3_RMH | RM122 | 1 | 62 | white | 8      | 0   | 0   | 1   | 1   | breast, ovary, lung |
| 3_RMH | RM128 | 1 | 65 | white | 8      | 0   | 1   | 1   | 0   | breast              |
| 3_RMH | RM129 | 1 | 64 | white | 8      | 0   | 0   | 0   | 1   | breast              |
| 3_RMH | RM142 | 1 | 62 | white | 9      | 1   | 0   | 0   | 1   | breast              |
| 3_RMH | RM152 | 1 | 53 | white | 9      | 1   | 0   | 1   | 0   | breast              |
| 3_RMH | RM004 | 1 | 63 | white | 9      | 0   | 0   | 0   | 0   |                     |
| 3_RMH | RM005 | 1 | 73 | white | 9      | 0   | 0   | 1   | 1   | nos                 |
| 3_RMH | RM010 | 1 | 47 | white | 9      | 0   | 0   | 0   | 0   |                     |
| 3_RMH | RM124 | 0 | 73 | white | 9      | 1   | 0   | 1   | 0   | other               |
| 3_RMH | RM014 | 0 | 51 | white | 6      | 0   | 0   | 1   | 0   | breast              |
| 3_RMH | RM016 | 0 | 57 | black | Unk    | 1   | 0   | 0   | 0   |                     |
| 3_RMH | RM018 | 0 | 58 | white | 6      | Unk | Unk | Unk | Unk |                     |
| 3_RMH | RM019 | 0 | 55 | white | 7(3+4) | Unk | Unk | Unk | Unk |                     |
| 3_RMH | RM170 | 0 | 61 | white | 9      | 0   | 0   | 1   | 0   | esophageal          |
| 3_RMH | RM021 | 0 | 75 | white | Unk    | 0   | 0   | 1   | 0   | pancreatic          |
| 3_RMH | RM022 | 0 | 62 | white | 7(3+4) | Unk | Unk | Unk | Unk |                     |
| 3_RMH | RM171 | 0 | 69 | white | Unk    | Unk | Unk | Unk | Unk |                     |
| 3_RMH | RM025 | 0 | 60 | white | 7(3+4) | 0   | 0   | 0   | 0   |                     |
| 3_RMH | RM026 | 0 | 59 | white | 5      | 1   | 0   | 0   | 0   |                     |
| 3_RMH | RM028 | 0 | 64 | white | 8      | 0   | 0   | 0   | 0   |                     |
| 3_RMH | RM029 | 0 | 51 | black | 6      | 0   | 0   | 0   | 0   |                     |
| 3_RMH | RM030 | 0 | 61 | white | 7(4+3) | 0   | 0   | 0   | 0   |                     |
| 3_RMH | RM100 | 0 | 64 | white | 9      | Unk | Unk | Unk | Unk |                     |
| 3_RMH | RM032 | 0 | 56 | black | 9      | 0   | 0   | 0   | 0   |                     |
| 3_RMH | RM033 | 0 | 59 | white | 7(4+3) | 0   | 0   | 1   | 0   | nos                 |
| 3_RMH | RM034 | 0 | 61 | white | 8      | 0   | 0   | 0   | 0   |                     |
| 3_RMH | RM038 | 0 | 55 | white | 6      | 1   | 0   | 0   | 0   |                     |
| 3_RMH | RM040 | 0 | 62 | white | 7(4+3) | 1   | 0   | 0   | 0   |                     |
| 3_RMH | RM041 | 0 | 64 | white | 9      | 0   | 1   | 1   | 0   | nos                 |
| 3_RMH | RM045 | 0 | 40 | white | 9      | 0   | 0   | 1   | 0   | pancreatic          |
| 3_RMH | RM173 | 0 | 43 | white | 7(3+4) | 0   | 0   | 1   | 1   | lung, melanoma      |
| 3_RMH | RM046 | 0 | 67 | white | 8      | 0   | 0   | 1   | 0   | lung, gastric       |
| 3_RMH | RM050 | 0 | 66 | white | 9      | 1   | 0   | 1   | 0   | ovary               |
| 3_RMH | RM053 | 0 | 57 | white | 9      | 0   | 0   | 0   | 0   |                     |
| 3_RMH | RM056 | 0 | 69 | white | 9      | 0   | 0   | 0   | 1   | breast              |
| 3_RMH | RM057 | 0 | 49 | white | 9      | 0   | 0   | 0   | 0   |                     |
| 3_RMH | RM059 | 0 | 66 | white | 8      | 0   | 1   | 0   | 0   |                     |
| 3_RMH | RM060 | 0 | 63 | white | 7(3+4) | 0   | 0   | 0   | 0   |                     |
| 3_RMH | RM063 | 0 | 56 | white | Unk    | Unk | Unk | Unk | Unk |                     |
| 3_RMH | RM064 | 0 | 66 | white | 9      | 0   | 0   | 0   | 0   |                     |
| 3_RMH | RM065 | 0 | 70 | white | 7(4+3) | 0   | 0   | 1   | 1   | breast, pancreatic  |
| 3_RMH | RM066 | 0 | 67 | white | 9      | 0   | 0   | 0   | 0   |                     |
| 3_RMH | RM068 | 0 | 56 | white | 7(4+3) | 0   | 1   | 1   | 1   | astrocytoma         |
| 3_RMH | RM177 | 0 | 54 | black | 8      | Unk | Unk | Unk | Unk |                     |
| 3_RMH | RM070 | 0 | 56 | white | 7(4+3) | 0   | 0   | 0   | 0   |                     |
| 3_RMH | RM074 | 0 | 60 | black | 9      | Unk | Unk | Unk | Unk |                     |
| 3_RMH | RM075 | 0 | 68 | white | 8      | 0   | 0   | 1   | 0   | breast              |
| 3_RMH | RM076 | 0 | 59 | white | 8      | 0   | 0   | 0   | 0   |                     |
| 3_RMH | RM078 | 0 | 51 | white | 7(4+3) | 1   | 0   | 1   | 0   | nos                 |
| 3_RMH | RM080 | 0 | 70 | white | 8      | 1   | 0   | 1   | 0   | breast              |
| 3_RMH | RM081 | 0 | 48 | white | 8      | 0   | 0   | 1   | 0   | nos                 |
| 3_RMH | RM178 | 0 | 62 | black | Unk    | 0   | 0   | 1   | 0   | leukemia            |
| 3_RMH | RM084 | 0 | 67 | white | 9      | 0   | 0   | 1   | 0   | nos                 |
| 3_RMH | RM200 | 0 | 61 | white | 7(3+4) | Unk | Unk | Unk | Unk |                     |
| 3_RMH | RM087 | 0 | 75 | white | 9      | 0   | 0   | 0   | 0   |                     |
| 3_RMH | RM088 | 0 | 61 | white | Unk    | Unk | Unk | Unk | Unk |                     |
| 3_RMH | RM089 | 0 | 70 | white | 9      | Unk | Unk | Unk | Unk |                     |
| 3_RMH | RM090 | 0 | 49 | white | 6      | 0   | 0   | 0   | 0   |                     |
| 3_RMH | RM092 | 0 | 73 | white | 6      | Unk | Unk | Unk | Unk |                     |
| 3_RMH | RM093 | 0 | 48 | white | 7(4+3) | 0   | 1   | 0   | 1   | breast              |

|       |        |   |    |       |        |     |     |     |     |                    |
|-------|--------|---|----|-------|--------|-----|-----|-----|-----|--------------------|
| 3_RMH | RM094  | 0 | 68 | white | 9      | 0   | 0   | 1   | 0   | nos                |
| 3_RMH | RM096  | 0 | 67 | white | 8      | 0   | 0   | 1   | 0   | nos                |
| 3_RMH | RM097  | 0 | 60 | white | 9      | 0   | 0   | 1   | 1   | breast             |
| 3_RMH | RM098  | 0 | 59 | white | Unk    | Unk | Unk | Unk | Unk |                    |
| 3_RMH | RM099  | 0 | 57 | white | 6      | 0   | 0   | 0   | 0   |                    |
| 3_RMH | RM102  | 0 | 70 | white | 7(3+4) | 0   | 0   | 0   | 0   |                    |
| 3_RMH | RM103  | 0 | 64 | white | 7(4+3) | Unk | Unk | Unk | Unk |                    |
| 3_RMH | RM104  | 0 | 67 | white | 10     | 0   | 0   | 0   | 0   |                    |
| 3_RMH | RM105  | 0 | 69 | white | 9      | 0   | 0   | 0   | 0   |                    |
| 3_RMH | RM106  | 0 | 67 | white | 9      | 0   | 0   | 0   | 0   |                    |
| 3_RMH | RM107  | 0 | 53 | white | Unk    | Unk | Unk | Unk | Unk |                    |
| 3_RMH | RM108  | 0 | 67 | white | 9      | 0   | 1   | 1   | 0   | pancreatic         |
| 3_RMH | RM109  | 0 | 67 | white | 8      | Unk | Unk | Unk | Unk |                    |
| 3_RMH | RM110  | 0 | 66 | white | Unk    | 1   | 0   | 1   | 0   | nos                |
| 3_RMH | RM111  | 0 | 55 | white | 7(4+3) | 0   | 0   | 1   | 0   | breast             |
| 3_RMH | RM112  | 0 | 73 | white | Unk    | 0   | 0   | 1   | 0   | nos                |
| 3_RMH | RM113  | 0 | 59 | white | 9      | 1   | 0   | 0   | 0   |                    |
| 3_RMH | RM115  | 0 | 62 | white | Unk    | 0   | 0   | 1   | 0   | nos                |
| 3_RMH | RM116  | 0 | 75 | white | 8      | 1   | 0   | 0   | 0   |                    |
| 3_RMH | RM118  | 0 | 54 | white | 7(3+4) | 1   | 0   | 0   | 1   | renal              |
| 3_RMH | RM119  | 0 | 58 | white | 9      | 0   | 0   | 0   | 0   |                    |
| 3_RMH | RM120  | 0 | 73 | white | 8      | 0   | 0   | 1   | 0   | nos                |
| 3_RMH | RM121  | 0 | 54 | white | 6      | 0   | 0   | 0   | 0   |                    |
| 3_RMH | RM123  | 0 | 73 | white | 9      | 0   | 0   | 0   | 0   |                    |
| 3_RMH | RM125  | 0 | 61 | white | Unk    | 0   | 0   | 1   | 0   |                    |
| 3_RMH | RM126  | 0 | 69 | black | 9      | 0   | 0   | 0   | 0   |                    |
| 3_RMH | RM127  | 0 | 60 | white | 9      | 1   | 0   | 0   | 0   |                    |
| 3_RMH | RM130  | 0 | 72 | white | Unk    | 0   | 0   | 1   | 0   | breast             |
| 3_RMH | RM131  | 0 | 60 | black | 6      | 0   | 0   | 0   | 0   |                    |
| 3_RMH | RM135  | 0 | 53 | black | 9      | 0   | 0   | 1   | 0   | nos                |
| 3_RMH | RM136  | 0 | 57 | white | 8      | 0   | 0   | 1   | 0   | nos                |
| 3_RMH | RM137  | 0 | 58 | white | Unk    | 1   | 0   | 0   | 0   |                    |
| 3_RMH | RM138  | 0 | 73 | white | 9      | 0   | 0   | 1   | 0   | nos                |
| 3_RMH | RM139  | 0 | 50 | white | Unk    | 1   | 1   | 1   | 0   | pancreatic         |
| 3_RMH | RM300  | 0 | 80 | white | 8      | Unk | Unk | Unk | Unk |                    |
| 3_RMH | RM141  | 0 | 68 | white | 9      | 0   | 0   | 1   | 0   | breast             |
| 3_RMH | RM143  | 0 | 68 | white | 10     | 0   | 0   | 1   | 1   | breast, pancreatic |
| 3_RMH | RM144  | 0 | 65 | white | 9      | 0   | 0   | 1   | 1   | lung, pancreatic   |
| 3_RMH | RM145  | 0 | 54 | white | 9      | 0   | 0   | 1   | 1   | breast, nos        |
| 3_RMH | RM146  | 0 | 67 | white | 10     | 0   | 0   | 1   | 0   | nos                |
| 3_RMH | RM147  | 0 | 62 | white | 9      | 0   | 0   | 1   | 0   | nos                |
| 3_RMH | RM148  | 0 | 59 | white | Unk    | 0   | 0   | 1   | 0   | nos                |
| 3_RMH | RM149  | 0 | 56 | asian | 6      | 0   | 0   | 1   | 0   | ovary              |
| 3_RMH | RM150  | 0 | 62 | white | 8      | 0   | 0   | 0   | 0   |                    |
| 3_RMH | RM151  | 0 | 64 | white | 7(3+4) | 0   | 0   | 1   | 0   | breast             |
| 3_RMH | RM153  | 0 | 59 | white | 8      | 0   | 0   | 1   | 0   | nos                |
| 3_RMH | RM154  | 0 | 64 | white | 9      | 0   | 0   | 1   | 0   | nos                |
| 3_RMH | RM155  | 0 | 61 | white | 10     | 0   | 0   | 1   | 0   | nos                |
| 3_RMH | RM156  | 0 | 68 | white | 10     | 0   | 0   | 0   | 0   |                    |
| 3_RMH | RM157  | 0 | 50 | white | 8      | 0   | 0   | 1   | 0   | breast             |
| 3_RMH | RM158  | 0 | 74 | white | Unk    | 0   | 0   | 1   | 0   | nos                |
| 3_RMH | RM159  | 0 | 62 | white | 9      | 0   | 0   | 1   | 1   | breast, ovary      |
| 3_RMH | RM160  | 0 | 65 | black | 9      | 0   | 0   | 0   | 0   |                    |
| 3_RMH | RM162  | 0 | 53 | white | 9      | 0   | 0   | 1   | 0   | breast             |
| 3_RMH | RM164  | 0 | 65 | white | 9      | 0   | 0   | 1   | 0   | nos                |
| 3_RMH | RM165  | 0 | 68 | white | 8      | 0   | 0   | 1   | 0   | nos                |
| 3_RMH | RM166  | 0 | 57 | white | 7(3+4) | 0   | 0   | 1   | 0   | breast             |
| 3_RMH | RM167  | 0 | 52 | black | Unk    | 0   | 0   | 1   | 0   | breast             |
| 3_RMH | RM006  | 0 | 61 | white | 9      | 1   | 0   | 0   | 0   |                    |
| 3_RMH | RM007  | 0 | 63 | white | 8      | 0   | 0   | 0   | 0   |                    |
| 3_RMH | RM008  | 0 | 68 | white | 8      | 0   | 0   | 0   | 0   |                    |
| 3_RMH | RM009  | 0 | 63 | white | 7(4+3) | 0   | 0   | 0   | 1   | breast             |
| 3_RMH | RM011  | 0 | 57 | white | 8      | 0   | 0   | 0   | 0   |                    |
| 4_UW  | 98-372 | 1 | 66 | asian | 6(2+4) | 0   | 0   | 1   | 0   | brain, uterine     |
| 4_UW  | 01-002 | 1 | 43 | white | 9(4+5) | 0   | 0   | 1   | 0   | cervical, melanoma |
| 4_UW  | 05-011 | 1 | 73 | white | 7(3+4) | 0   | 0   | 0   | 1   | nos                |

|      |        |   |     |       |         |     |     |     |     |                            |
|------|--------|---|-----|-------|---------|-----|-----|-----|-----|----------------------------|
| 4_UW | 06-134 | 1 | 67  | asian | 9(5+4)  | 0   | 0   | 1   | 1   | nasopharyngeal, esophgeal  |
| 4_UW | 13-117 | 1 | 56  | white | 9(4+5)  | 0   | 0   | 1   | 0   | nos                        |
| 4_UW | 99-091 | 1 | 73  | Unk   | 9(4+5)  | Unk | Unk | Unk | Unk | unknown                    |
| 4_UW | 07-097 | 1 | 63  | white | 8(4+4)  | 0   | 0   | 1   | 1   | colon, colon               |
| 4_UW | 09-012 | 1 | 59  | white | 9(4+5)  | 0   | 0   | 1   | 1   | Hodgkin, lung, nos         |
| 4_UW | 00-140 | 0 | 57  | white | 9(4+5)  | 0   | 0   | 0   | 1   | gastric cancer in uncles   |
| 4_UW | 02-190 | 0 | 61  | white | 9(unk)  | 0   | 0   | 1   | 0   | lymphoma, colon, lung      |
| 4_UW | 06-127 | 0 | 75  | white | 7(unk)  | Unk | Unk | Unk | Unk | unknown                    |
| 4_UW | 06-131 | 0 | 64  | white | 7(4+3)  | 1   | 0   | 1   | 0   | lung, nos                  |
| 4_UW | 07-042 | 0 | 54  | white | 9(5+4)  | Unk | Unk | Unk | Unk | unknown                    |
| 4_UW | 98-328 | 0 | 52  | white | unkown  | Unk | Unk | Unk | Unk | unknown                    |
| 4_UW | 98-362 | 0 | 70  | white | unkown  | Unk | Unk | Unk | Unk | unknown                    |
| 4_UW | 98-380 | 0 | 76  | white | 6(3+3)  | 0   | 0   | 0   | 0   |                            |
| 4_UW | 99-064 | 0 | 49  | mixed | unkown  | 0   | 0   | 0   | 1   | gastric                    |
| 4_UW | 99-069 | 0 | 55  | white | 9(9)    | 0   | 0   | 1   | 0   | gastric                    |
| 4_UW | 99-090 | 0 | Unk | Unk   | unkown  | Unk | Unk | Unk | Unk | unknown                    |
| 4_UW | 00-169 | 0 | 63  | white | unkown  | 0   | 0   | 0   | 0   |                            |
| 4_UW | 01-046 | 0 | 60  | white | 8(3+5)  | 0   | 0   | 0   | 0   |                            |
| 4_UW | 01-087 | 0 | 64  | white | 5(unk)  | Unk | Unk | Unk | Unk | unknown                    |
| 4_UW | 01-095 | 0 | 62  | white | 7(unk)  | Unk | Unk | Unk | Unk | unknown                    |
| 4_UW | 01-120 | 0 | 53  | white | 7(unk)  | Unk | Unk | Unk | Unk | unknown                    |
| 4_UW | 02-083 | 0 | 59  | white | unkown  | 0   | 0   | 0   | 0   |                            |
| 4_UW | 03-026 | 0 | 63  | white | 8(unk)  | 1   | 0   | 0   | 0   |                            |
| 4_UW | 03-027 | 0 | 70  | mixed | 8(4+4)  | 0   | 0   | 0   | 0   |                            |
| 4_UW | 03-139 | 0 | 74  | white | 7(4+3)  | 0   | 0   | 0   | 0   | unknown                    |
| 4_UW | 03-081 | 0 | 68  | white | 5(2+3)  | Unk | Unk | Unk | Unk | unknown                    |
| 4_UW | 03-082 | 0 | 59  | white | 9(5+4)  | 0   | 0   | 1   | 0   | colon, brain               |
| 4_UW | 03-130 | 0 | 63  | white | 8(3+5)  | 0   | 0   | 1   | 0   | leukemia, thryoid          |
| 4_UW | 03-163 | 0 | 53  | white | 9(4+5)  | 0   | 0   | 1   | 0   | bladder                    |
| 4_UW | 03-192 | 0 | 62  | white | 7(unk)  | 0   | 0   | 0   | 0   |                            |
| 4_UW | 04-101 | 0 | 78  | white | 9(4+5)  | 1   | 0   | 1   | 0   | lung                       |
| 4_UW | 04-108 | 0 | 57  | white | 7(3+4)  | Unk | Unk | Unk | Unk | unknown                    |
| 4_UW | 04-112 | 0 | 58  | white | 9(4+5)  | 0   | 0   | 1   | 0   | lung                       |
| 4_UW | 04-149 | 0 | 79  | white | unkown  | 0   | 0   | 0   | 0   |                            |
| 4_UW | 05-092 | 0 | 75  | white | 10(5+5) | 0   | 0   | 0   | 1   | head & neck, colon         |
| 4_UW | 05-116 | 0 | 63  | white | 8(4+4)  | 1   | 0   | 0   | 0   |                            |
| 4_UW | 05-123 | 0 | 72  | white | 9(4+5)  | 0   | 0   | 1   | 0   | nos                        |
| 4_UW | 05-144 | 0 | 59  | white | 9(4+5)  | 0   | 0   | 1   | 0   | head & neck                |
| 4_UW | 05-165 | 0 | 67  | white | 7(3+4)  | Unk | Unk | Unk | Unk | unknown                    |
| 4_UW | 05-187 | 0 | 58  | mixed | 9(5+4)  | 0   | 0   | 1   | 0   | soft tissue sarcoma        |
| 4_UW | 05-214 | 0 | 62  | white | 6(3+3)  | 0   | 0   | 0   | 0   |                            |
| 4_UW | 05-217 | 0 | 64  | white | 6(3+3)  | 0   | 0   | 0   | 0   |                            |
| 4_UW | 05-221 | 0 | 63  | white | 9(4+5)  | 1   | 0   | 1   | 0   | breast, breast             |
| 4_UW | 06-047 | 0 | 62  | white | 7(4+3)  | 0   | 0   | 0   | 0   |                            |
| 4_UW | 06-081 | 0 | 66  | mixed | 8(4+4)  | 0   | 0   | 0   | 1   | ovary, bladder, breast     |
| 4_UW | 07-062 | 0 | 70  | mixed | 6(3+3)  | Unk | Unk | Unk | Unk |                            |
| 4_UW | 08-006 | 0 | 60  | white | 7(4+3)  | 1   | 0   | 1   | 0   | melanoma, intestinal       |
| 4_UW | 08-016 | 0 | 57  | white | 8(4+4)  | Unk | Unk | Unk | Unk | unknown                    |
| 4_UW | 08-020 | 0 | 65  | white | 7(3+4)  | 1   | 0   | 0   | 0   |                            |
| 4_UW | 08-037 | 0 | 60  | white | 7(4+3)  | 1   | 0   | 1   | 0   | breast, lymphoma           |
| 4_UW | 08-093 | 0 | 60  | white | 9(5+4)  | 0   | 0   | 0   | 1   | renal cell, colon          |
| 4_UW | 10-013 | 0 | 51  | white | 7(4+3)  | 0   | 0   | 1   | 0   | melanoma                   |
| 4_UW | 10-056 | 0 | 63  | white | 8(4+4)  | 0   | 1   | 1   | 0   | Hodgkin, breast, lung, nos |
| 4_UW | 12-005 | 0 | 71  | white | 9(4+5)  | 0   | 0   | 1   | 0   | colon                      |
| 4_UW | 12-011 | 0 | 59  | Unk   | unkown  | 1   | 0   | 0   | 0   |                            |
| 4_UW | 12-021 | 0 | 73  | white | 8(4+4)  | 1   | 0   | 0   | 0   |                            |
| 4_UW | 13-012 | 0 | 69  | white | 7(4+3)  | 0   | 0   | 1   | 0   | ovary                      |
| 4_UW | 13-042 | 0 | 43  | white | 9(4+5)  | 0   | 0   | 1   | 1   | colon, gastric, leukemia   |
| 4_UW | 13-084 | 0 | 60  | white | 9(4+5)  | Unk | Unk | Unk | Unk | unknown                    |
| 4_UW | 13-099 | 0 | 68  | white | 8(4+4)  | 0   | 0   | 1   | 0   | breast & uterine           |
| 4_UW | 13-101 | 0 | 57  | white | 7(3+4)  | 0   | 0   | 0   | 0   |                            |

|      |        |   |     |          |          |     |     |     |     |                         |
|------|--------|---|-----|----------|----------|-----|-----|-----|-----|-------------------------|
| 4_UW | 13-104 | 0 | 70  | white    | 6(3+3)   | 0   | 0   | 1   | 0   | breast                  |
| 4_UW | 14-031 | 0 | 77  | white    | 10(5+5)  | 1   | 0   | 1   | 0   | colon, brain            |
| 4_UW | 14-039 | 0 | 66  | white    | 9(4+5)   | 0   | 0   | 0   | 0   |                         |
| 4_UW | 14-043 | 0 | 75  | white    | 9(4+5)   | Unk | Unk | Unk | Unk | unknown                 |
| 4_UW | 14-053 | 0 | 51  | white    | 7(4+3)   | 0   | 0   | 0   | 1   | colon                   |
| 4_UW | 14-077 | 0 | 55  | white    | 9(4+3+5) | 0   | 0   | 0   | 1   | lymphoma, lymphoma      |
| 4_UW | 98-343 | 0 | 60  | white    | unknown  | Unk | Unk | Unk | Unk | unknown                 |
| 4_UW | 98-388 | 0 | 43  | white    | 6(3+3)   | Unk | Unk | Unk | Unk | unknown                 |
| 4_UW | 98-500 | 0 | 47  | white    | unknown  | Unk | Unk | Unk | Unk | unknown                 |
| 4_UW | 99-033 | 0 | 63  | Unk      | 7(4+3)   | 0   | 0   | 0   | 1   | colon                   |
| 4_UW | 00-147 | 0 | 48  | white    | 8(5+3)   | 0   | 1   | 1   | 0   | leukemia                |
| 4_UW | 01-063 | 0 | 61  | white    | unknown  | Unk | Unk | Unk | Unk | unknown                 |
| 4_UW | 01-181 | 0 | Unk | Unk      | unknown  | Unk | Unk | Unk | Unk | unknown                 |
| 4_UW | 02-065 | 0 | 63  | white    | 7(3+4)   | 0   | 0   | 1   | 0   | colon, lymphoma         |
| 4_UW | 02-076 | 0 | 75  | white    | 10(5+5)  | 0   | 0   | 1   | 1   | colon, uterine, gastric |
| 4_UW | 02-142 | 0 | 66  | white    | unknown  | 1   | 0   | 0   | 0   |                         |
| 4_UW | 03-077 | 0 | 62  | white    | 9(4+5)   | 1   | 0   | 1   | 0   | esophageal              |
| 4_UW | 04-050 | 0 | 74  | mixed    | 7(4+3)   | 0   | 0   | 1   | 0   | colon                   |
| 4_UW | 05-148 | 0 | 65  | white    | 9(4+5)   | 0   | 0   | 0   | 0   | unknown                 |
| 4_UW | 06-046 | 0 | 62  | white    | unknown  | 0   | 0   | 0   | 0   |                         |
| 4_UW | 06-064 | 0 | 93  | mixed    | 9(4+5)   | 0   | 0   | 1   | 0   | breast, ovary           |
| 4_UW | 07-044 | 0 | 60  | white    | 7(3+4)   | 1   | 1   | 0   | 0   |                         |
| 4_UW | 07-050 | 0 | 73  | mixed    | 10(5+5)  | 0   | 0   | 0   | 0   |                         |
| 4_UW | 07-083 | 0 | 65  | white    | 6(3+3)   | 0   | 0   | 0   | 0   |                         |
| 4_UW | 10-039 | 0 | 72  | white    | 8(3+5)   | Unk | Unk | Unk | Unk | unknown                 |
| 4_UW | 10-068 | 0 | 62  | mixed    | 7(4+3)   | 0   | 0   | 1   | 1   | breast & gastric, nos   |
| 4_UW | 13-122 | 0 | 63  | white    | 9(4+5)   | 0   | 0   | 1   | 1   | lung, breast            |
| 5_WC | PM12   | 1 | 67  | white    | 9(4+5)   | 0   | 0   | 1   | 0   |                         |
| 5_WC | PM156  | 1 | 61  | Unk      | Unk      | Unk | Unk | Unk | Unk |                         |
| 5_WC | PM183  | 1 | 59  | hispanic | 7(4+3)   | 0   | 0   | 0   | 0   |                         |
| 5_WC | PM195  | 1 | 69  | white    | 5 (3+2)  | 0   | 0   | 0   | 0   |                         |
| 5_WC | PM258  | 1 | 59  | hispanic | 7(4+3)   | 1   | 0   | 1   | 1   | breast, nos x3          |
| 5_WC | PM365  | 1 | 76  | white    | Unk      | 1   | 0   | 1   | 0   | prostate and pancreatic |
| 5_WC | PM63   | 1 | 55  | black    | 8(4+4)   | 0   | 0   | 0   | 0   |                         |
| 5_WC | PM169  | 0 | 64  | white    | 9(5+4)   | 1   | 0   | 0   | 1   | breast, nos x 3         |
| 5_WC | PM6    | 0 | 55  | white    | 7(3+4)   | 1   | 0   | 0   | 1   |                         |
| 5_WC | PM0    | 0 | 54  | hispanic | 7(unk)   | 0   | 0   | 0   | 0   |                         |
| 5_WC | PM1    | 0 | 71  | hispanic | Unk      | 0   | 0   | 0   | 0   |                         |
| 5_WC | PM10   | 0 | 86  | white    | Unk      | 0   | 0   | 1   | 0   | esophageal              |
| 5_WC | PM11   | 0 | 81  | asian    | 10(5+5)  | 0   | 0   | 0   | 0   |                         |
| 5_WC | PM119  | 0 | 60  | white    | 8(4+4)   | 1   | 0   | 0   | 0   |                         |
| 5_WC | PM121  | 0 | 59  | white    | 9(4+5)   | 1   | 0   | 1   | 0   | breast                  |
| 5_WC | PM124  | 0 | 80  | asian    | 9(4+5)   | 0   | 0   | 0   | 0   |                         |
| 5_WC | PM131  | 0 | 59  | white    | Unk      | 0   | 0   | 1   | 0   | gastric                 |
| 5_WC | PM139  | 0 | 73  | white    | 9(4+5)   | 0   | 0   | 0   | 0   |                         |
| 5_WC | PM14   | 0 | 63  | asian    | 9(5+4)   | 0   | 0   | 1   | 0   | nos                     |
| 5_WC | PM142  | 0 | 75  | white    | Unk      | 0   | 0   | 0   | 0   |                         |
| 5_WC | PM154  | 0 | 79  | white    | Unk      | 0   | 0   | 1   | 0   | breast and colon, lung  |
| 5_WC | PM155  | 0 | 86  | white    | Unk      | 0   | 0   | 0   | 0   |                         |
| 5_WC | PM158  | 0 | 55  | white    | 8(4+4)   | 0   | 0   | 0   | 1   | ovary                   |
| 5_WC | PM159  | 0 | 63  | hispanic | 8(4+4)   | 0   | 0   | 0   | 0   |                         |
| 5_WC | PM160  | 0 | 72  | white    | Unk      | 0   | 0   | 1   | 0   | ovary, lung             |
| 5_WC | PM162  | 0 | 65  | hispanic | 9(5+4)   | 0   | 0   | 0   | 0   |                         |
| 5_WC | PM163  | 0 | 65  | black,   | 9(4+5)   | 0   | 0   | 1   | 0   | gallbladder             |
| 5_WC | PM164  | 0 | 77  | white    | 9(4+5)   | 0   | 0   | 1   | 0   | nos                     |
| 5_WC | PM170  | 0 | 67  | white    | 8(4+4)   | 1   | 1   | 0   | 0   |                         |
| 5_WC | PM172  | 0 | 63  | white    | 8(4+4)   | 0   | 0   | 0   | 0   |                         |
| 5_WC | PM185  | 0 | 59  | black    | 8(4+4)   | 0   | 0   | 0   | 0   |                         |
| 5_WC | PM187  | 0 | 53  | asian    | 7(4+3)   | 1   | 1   | 0   | 0   |                         |
| 5_WC | PM189  | 0 | 80  | white    | 9(4+5)   | 0   | 0   | 0   | 0   |                         |
| 5_WC | PM192  | 0 | 67  | white    | Unk      | 0   | 0   | 0   | 0   |                         |
| 5_WC | PM199  | 0 | 66  | Unk      | Unk      | Unk | Unk | Unk | Unk |                         |
| 5_WC | PM2    | 0 | 73  | white    | 8(4+4)   | 0   | 0   | 0   | 0   |                         |
| 5_WC | PM201  | 0 | 51  | white    | 8(unk)   | 1   | 0   | 1   | 1   | breast, breast, breast  |

|      |       |   |     |          |                                 |     |     |     |     |                      |
|------|-------|---|-----|----------|---------------------------------|-----|-----|-----|-----|----------------------|
| 5_WC | PM207 | 0 | 68  | white    | 10(5+5)                         | Unk | Unk | Unk | Unk |                      |
| 5_WC | PM213 | 0 | 62  | white    | 9(5+4)                          | 1   | 0   | 0   | 0   |                      |
| 5_WC | PM218 | 0 | 60  | white    | 7(4+3)                          | 0   | 0   | 0   | 0   |                      |
| 5_WC | PM219 | 0 | 62  | black    | 7(4+3 with tertiary 5)          | 0   | 0   | 0   | 0   |                      |
| 5_WC | PM221 | 0 | Unk | Unk      | Unk                             | Unk | Unk | Unk | Unk |                      |
| 5_WC | PM223 | 0 | 52  | black    | Unk                             | Unk | Unk | Unk | Unk |                      |
| 5_WC | PM243 | 0 | 77  | white    | 9(4+5)                          | 0   | 0   | 0   | 0   | breast               |
| 5_WC | PM247 | 0 | 86  | white    | 8(4+4)                          | 0   | 0   | 0   | 0   | breast               |
| 5_WC | PM252 | 0 | 66  | white    | 7(4+3)                          | 0   | 0   | 0   | 0   |                      |
| 5_WC | PM253 | 0 | 68  | white    | 7(3+4)                          | 1   | 0   | 0   | 0   |                      |
| 5_WC | PM261 | 0 | 67  | hispanic | 7(4+3)                          | 1   | 0   | 0   | 0   |                      |
| 5_WC | PM3   | 0 | 78  | white    | Unk                             | 0   | 0   | 0   | 0   |                      |
| 5_WC | PM322 | 0 | 58  | black    | 9(4+5)                          | 1   | 0   | 0   | 0   |                      |
| 5_WC | PM330 | 0 | 70  | Unk      | 7(3+4)                          | 1   | 0   | 0   | 0   |                      |
| 5_WC | PM335 | 0 | 43  | hispanic | 7(3+4)                          | 0   | 0   | 1   | 0   | breast, colon        |
| 5_WC | PM340 | 0 | Unk | Unk      | Unk                             | Unk | Unk | Unk | Unk |                      |
| 5_WC | PM341 | 0 | Unk | Unk      | Unk                             | Unk | Unk | Unk | Unk |                      |
| 5_WC | PM342 | 0 | Unk | Unk      | Unk                             | Unk | Unk | Unk | Unk |                      |
| 5_WC | PM360 | 0 | Unk | Unk      | Unk                             | Unk | Unk | Unk | Unk |                      |
| 5_WC | PM366 | 0 | 50  | white    | 6(3+3)                          | 0   | 0   | 1   | 0   | colon                |
| 5_WC | PM376 | 0 | 81  | asian    | Unk                             | 0   | 0   | 0   | 0   |                      |
| 5_WC | PM4   | 0 | 59  | white    | 5+4=9<br>Bone and LN mets at dx | 0   | 0   | 0   | 0   |                      |
| 5_WC | PM5   | 0 | 48  | white    | 3+2=5                           | 0   | 0   | 0   | 0   |                      |
| 5_WC | PM59  | 0 | Unk | Unk      | Unk                             | Unk | Unk | Unk | Unk |                      |
| 5_WC | PM7   | 0 | 61  | white    | 9(5+4)                          | 0   | 0   | 0   | 0   |                      |
| 5_WC | PM73  | 0 | 86  | white    | 9(5+4)                          | 0   | 0   | 1   | 0   | breast and lung      |
| 5_WC | PM78  | 0 | 76  | white    | Unk                             | 0   | 0   | 0   | 0   |                      |
| 5_WC | PM80  | 0 | 62  | white    | 6 (3+3)                         | 0   | 0   | 0   | 0   |                      |
| 5_WC | PM89  | 0 | 50  | white    | 9(4+5)                          | 0   | 0   | 1   | 0   | breast               |
| 5_WC | PM9   | 0 | 64  | white    | 9(5+4)                          | 0   | 0   | 1   | 0   | breast               |
| 5_WC | PM90  | 0 | 59  | white    | 7(4+3)                          | 0   | 0   | 0   | 0   |                      |
| 5_WC | PM91  | 0 | 54  | hispanic | 10(5+5)                         | 0   | 0   | 0   | 0   |                      |
| 6_UM | WA_29 | 1 | 67  | white    | 8                               | Unk | Unk | Unk | Unk |                      |
| 6_UM | WA_24 | 1 | 72  | white    | 8                               | 0   | 0   | 0   | 0   |                      |
| 6_UM | WA_46 | 1 | 66  | white    | 9                               | Unk | Unk | Unk | Unk |                      |
| 6_UM | WA_40 | 1 | 72  | white    | 10                              | 0   | 0   | 1   | 0   | ovary, uterine       |
| 6_UM | WA_7  | 0 | 61  | black    | 9                               | 0   | 0   | 1   | 0   | breast               |
| 6_UM | WA_35 | 0 | 61  | black    | 9                               | 0   | 0   | 0   | 1   | colon                |
| 6_UM | WA_33 | 0 | 48  | asian    | 10                              | 0   | 0   | 1   | 0   | multiple myeloma     |
| 6_UM | WA_23 | 0 | 65  | white    | 6                               | 0   | 0   | 1   | 0   | head and neck        |
| 6_UM | WA_22 | 0 | 61  | white    | 8                               | Unk | Unk | Unk | Unk | unknown              |
| 6_UM | WA_11 | 0 | 64  | white    | 8                               | 0   | 0   | 0   | 0   |                      |
| 6_UM | WA_48 | 0 | 69  | white    | 8                               | Unk | Unk | Unk | Unk | unknown              |
| 6_UM | WA_43 | 0 | 47  | white    | 9                               | 0   | 0   | 0   | 1   | lung                 |
| 6_UM | WA_31 | 0 | 54  | white    | 9                               | 0   | 0   | 0   | 1   | breast               |
| 6_UM | WA_20 | 0 | 59  | white    | 9                               | 0   | 0   | 0   | 0   |                      |
| 6_UM | WA_37 | 0 | 60  | white    | 9                               | 0   | 0   | 1   | 0   | breast               |
| 6_UM | WA_38 | 0 | 63  | white    | 9                               | 1   | 0   | 1   | 0   | breast, colon, ovary |
| 6_UM | WA_53 | 0 | 64  | white    | 9                               | 0   | 0   | 1   | 0   | uterine              |
| 6_UM | WA_30 | 0 | 67  | white    | 9                               | 0   | 0   | 0   | 0   |                      |
| 6_UM | WA_55 | 0 | 68  | white    | 9                               | 0   | 0   | 0   | 0   |                      |
| 6_UM | WA_13 | 0 | 60  | white    | 10                              | 0   | 0   | 1   | 0   | lung                 |
| 6_UM | WA_41 | 0 | 61  | white    | 7(3+4)                          | 0   | 0   | 0   | 0   |                      |
| 6_UM | WA_51 | 0 | 54  | white    | 7(4+3)                          | 0   | 0   | 0   | 0   |                      |
| 6_UM | WA_49 | 0 | 60  | white    | 7(4+3)                          | 0   | 0   | 1   | 0   | breast               |
| 6_UM | WA_54 | 0 | 60  | white    | 7(4+3)                          | 0   | 0   | 1   | 0   | lung                 |
| 6_UM | WA_47 | 0 | 61  | white    | 7(4+3)                          | 0   | 0   | 1   | 0   |                      |
| 6_UM | WA_27 | 0 | 66  | white    | 7(unk)                          | 1   | 1   | 0   | 0   |                      |
| 6_UM | WA_3  | 0 | 51  | white    | Unk                             | 0   | 0   | 0   | 0   |                      |
| 6_UM | WA_39 | 0 | 56  | white    | Unk                             | Unk | Unk | Unk | Unk | unknown              |
| 6_UM | WA_14 | 0 | 60  | white    | Unk                             | Unk | Unk | Unk | Unk | unknown              |
| 6_UM | WA_25 | 0 | 62  | white    | Unk                             | 0   | 0   | 1   | 0   | lung                 |
| 6_UM | WA_50 | 0 | 62  | white    | Unk                             | 0   | 0   | 0   | 0   |                      |
| 6_UM | WA_26 | 0 | 63  | white    | Unk                             | 0   | 0   | 1   | 0   | breast               |
| 6_UM | WA_28 | 0 | 65  | white    | Unk                             | 0   | 0   | 0   | 0   |                      |



|       |        |   |    |       |        |     |     |     |     |                                                              |
|-------|--------|---|----|-------|--------|-----|-----|-----|-----|--------------------------------------------------------------|
| 6_UM  | WA_52  | 0 | 66 | white | Unk    | 0   | 0   | 1   | 0   | breast, brain, oropharyngeal                                 |
| 6_UM  | WA_16  | 0 | 67 | white | Unk    | 0   | 0   | 1   | 0   | nos                                                          |
| 6_UM  | WA_32  | 0 | 69 | white | Unk    | 1   | 0   | 1   | 0   | rectal                                                       |
| 6_UM  | WA_15  | 0 | 72 | white | Unk    | Unk | Unk | Unk | Unk | unknown                                                      |
| 6_UM  | WA_18  | 0 | 49 | Unk   | 5      | 0   | 0   | 1   | 0   | throat, nos                                                  |
| 6_UM  | WA_12  | 0 | 74 | Unk   | 10     | 0   | 0   | 1   | 0   | multiple myeloma                                             |
| 6_UM  | WA_42  | 0 | 56 | Unk   | 7(3+4) | 1   | 0   | 0   | 0   |                                                              |
| 6_UM  | WA_17  | 0 | 71 | Unk   | 7(unk) | 0   | 0   | 1   | 0   | lung                                                         |
| 6_UM  | WA_10  | 0 | 72 | Unk   | Unk    | Unk | Unk | Unk | Unk | unknown                                                      |
| 6_UM  | WA_19  | 0 | 75 | Unk   | Unk    | 0   | 0   | 1   | 0   | breast                                                       |
| 7_MSK | MSK025 | 1 | 65 | Unk   | 8(4+4) | 0   | 0   | 0   | 1   | CLL, lung, nos                                               |
| 7_MSK | MSK011 | 1 | 49 | white | 7(3+4) | 0   | 0   | 1   | 0   | gastric, breast and ovary                                    |
| 7_MSK | MSK021 | 1 | 54 | white | 7(3+4) | 1   | 0   | 1   | 0   | prostate and colon, breast                                   |
| 7_MSK | MSK005 | 1 | 51 | white | 7(4+3) | 0   | 0   | 1   | 1   | ovary, ovary, colon and breast                               |
| 7_MSK | MSK009 | 1 | 58 | white | 7(4+3) | 0   | 0   | 1   | 0   | lung                                                         |
| 7_MSK | MSK003 | 1 | 62 | white | 7(4+3) | 0   | 0   | 1   | 1   | gastric, pancreatic, breast, brain, colon                    |
| 7_MSK | MSK017 | 1 | 66 | white | 7(4+3) | 0   | 0   | 1   | 1   | colon, pancreatic, breast, breast                            |
| 7_MSK | MSK010 | 1 | 58 | white | 8(4+4) | 1   | 0   | 1   | 1   | colon and prostate and melanoma, non-hodgkin lymphoma, colon |
| 7_MSK | MSK008 | 1 | 59 | white | 8(4+4) | 1   | 1   | 1   | 0   | breast                                                       |
| 7_MSK | MSK012 | 1 | 64 | white | 8(4+4) | 0   | 0   | 1   | 0   | ovary and leukemia, liposarcoma                              |
| 7_MSK | MSK027 | 1 | 64 | white | 8(4+4) | 0   | 1   | 1   | 0   | colon                                                        |
| 7_MSK | MSK020 | 1 | 68 | white | 8(4+4) | 0   | 0   | 0   | 1   | nos                                                          |
| 7_MSK | MSK018 | 1 | 48 | white | 8(4+4) | 0   | 0   | 0   | 1   | pancreatic                                                   |
| 7_MSK | MSK015 | 1 | 57 | white | 9(4+5) | 0   | 0   | 1   | 0   | adrenal cortical carcinoma, breast, GE junction              |
| 7_MSK | MSK013 | 1 | 58 | white | 9(4+5) | 1   | 0   | 1   | 1   | colon, gastric                                               |
| 7_MSK | MSK004 | 1 | 59 | white | 9(4+5) | 1   | 0   | 1   | 1   | prostate and pancreatic, breast                              |
| 7_MSK | MSK007 | 1 | 61 | white | 9(4+5) | 0   | 0   | 1   | 1   | ovary, melanoma, leukemia, mesothelioma                      |
| 7_MSK | MSK016 | 1 | 65 | white | 9(4+5) | 0   | 0   | 1   | 1   | uterine, pancreatic                                          |
| 7_MSK | MSK026 | 1 | 66 | white | 9(4+5) | 0   | 0   | 1   | 1   | breast and breast                                            |
| 7_MSK | MSK006 | 1 | 56 | white | 9(5+4) | 0   | 0   | 0   | 0   |                                                              |
| 7_MSK | MSK014 | 1 | 61 | white | 9(5+4) | 0   | 0   | 1   | 1   | esophageal and gastric, colon                                |
| 7_MSK | MSK019 | 1 | 64 | white | 9(5+4) | 0   | 0   | 1   | 0   | leiomyosarcoma                                               |
| 7_MSK | MSK022 | 1 | 75 | white | 9(5+4) | 0   | 0   | 1   | 1   | ovary, lung, colon, gastric                                  |
| 7_MSK | MSK118 | 0 | 55 | asian | 7(4+3) | 0   | 0   | 1   | 0   | gastric                                                      |
| 7_MSK | MSK036 | 0 | 64 | black | 7(3+4) | 1   | 0   | 1   | 0   | prostate, rectal                                             |
| 7_MSK | MSK059 | 0 | 60 | black | 7(4+3) | 0   | 0   | 0   | 0   |                                                              |
| 7_MSK | MSK061 | 0 | 55 | black | 8(3+5) | 0   | 0   | 0   | 0   |                                                              |
| 7_MSK | MSK121 | 0 | 58 | black | 8(4+4) | 0   | 0   | 1   | 0   | breast                                                       |
| 7_MSK | MSK049 | 0 | 55 | black | 9(5+4) | 1   | 0   | 1   | 1   | prostate, colon, lymphoma                                    |
| 7_MSK | MSK055 | 0 | 59 | Unk   | 7(4+3) | 0   | 0   | 1   | 0   | lung                                                         |
| 7_MSK | MSK054 | 0 | 64 | Unk   | 8(4+4) | 0   | 0   | 0   | 0   |                                                              |
| 7_MSK | MSK058 | 0 | 48 | Unk   | 9(4+5) | 1   | 1   | 0   | 1   | prostate, prostate, lung                                     |
| 7_MSK | MSK099 | 0 | 57 | Unk   | 9(4+5) | 0   | 0   | 1   | 0   | esophageal                                                   |
| 7_MSK | MSK097 | 0 | 58 | Unk   | 9(4+5) | 0   | 0   | 1   | 1   | vaginal, gastric                                             |

|       |        |   |    |       |        |   |   |   |   |                                                             |
|-------|--------|---|----|-------|--------|---|---|---|---|-------------------------------------------------------------|
| 7_MSK | MSK075 | 0 | 51 | white | 4(2+2) | 1 | 1 | 1 | 1 | prostate, prostate, breast, leukemia                        |
| 7_MSK | MSK039 | 0 | 50 | white | 6(3+3) | 0 | 0 | 1 | 0 | thyroid                                                     |
| 7_MSK | MSK023 | 0 | 58 | white | 6(3+3) | 0 | 1 | 0 | 1 | brain tumor                                                 |
| 7_MSK | MSK092 | 0 | 75 | white | 6(3+3) | 1 | 1 | 1 | 0 | brain tumor                                                 |
| 7_MSK | MSK045 | 0 | 52 | white | 7(3+4) | 0 | 0 | 1 | 0 | melanoma, colon                                             |
| 7_MSK | MSK110 | 0 | 52 | white | 7(3+4) | 1 | 0 | 0 | 0 | prostate                                                    |
| 7_MSK | MSK037 | 0 | 53 | white | 7(3+4) | 0 | 0 | 0 | 1 | breast                                                      |
| 7_MSK | MSK111 | 0 | 54 | white | 7(3+4) | 0 | 0 | 1 | 0 | leukemia                                                    |
| 7_MSK | MSK033 | 0 | 59 | white | 7(3+4) | 0 | 1 | 0 | 0 |                                                             |
| 7_MSK | MSK116 | 0 | 60 | white | 7(3+4) | 1 | 0 | 1 | 0 | lung                                                        |
| 7_MSK | MSK043 | 0 | 61 | white | 7(3+4) | 0 | 0 | 1 | 0 | CLL                                                         |
| 7_MSK | MSK056 | 0 | 61 | white | 7(3+4) | 1 | 0 | 0 | 0 |                                                             |
| 7_MSK | MSK074 | 0 | 67 | white | 7(3+4) | 0 | 0 | 0 | 0 |                                                             |
| 7_MSK | MSK078 | 0 | 68 | white | 7(3+4) | 1 | 1 | 0 | 0 | prostate, prostate, prostate                                |
| 7_MSK | MSK093 | 0 | 43 | white | 7(4+3) | 1 | 0 | 0 | 0 |                                                             |
| 7_MSK | MSK104 | 0 | 45 | white | 7(4+3) | 1 | 1 | 0 | 1 | prostate and leukemia, colon                                |
| 7_MSK | MSK024 | 0 | 47 | white | 7(4+3) | 1 | 0 | 1 | 0 | prostate and brian and lung and thyroid, thyroid and breast |
| 7_MSK | MSK119 | 0 | 47 | white | 7(4+3) | 0 | 0 | 1 | 0 | pancreatic, leukemia                                        |
| 7_MSK | MSK050 | 0 | 50 | white | 7(4+3) | 0 | 1 | 0 | 1 | GI cancer                                                   |
| 7_MSK | MSK073 | 0 | 55 | white | 7(4+3) | 1 | 0 | 1 | 0 | ovary                                                       |
| 7_MSK | MSK081 | 0 | 56 | white | 7(4+3) | 0 | 0 | 1 | 0 | lymphoma and gastric cancer                                 |
| 7_MSK | MSK089 | 0 | 57 | white | 7(4+3) | 1 | 0 | 1 | 0 | breast                                                      |
| 7_MSK | MSK042 | 0 | 58 | white | 7(4+3) | 0 | 0 | 1 | 0 | colon                                                       |
| 7_MSK | MSK079 | 0 | 62 | white | 7(4+3) | 0 | 0 | 1 | 0 | breast and ovary, uterine                                   |
| 7_MSK | MSK117 | 0 | 62 | white | 7(4+3) | 0 | 0 | 0 | 0 |                                                             |
| 7_MSK | MSK077 | 0 | 64 | white | 7(4+3) | 0 | 0 | 1 | 0 | colon                                                       |
| 7_MSK | MSK088 | 0 | 64 | white | 7(4+3) | 1 | 0 | 1 | 1 | breast, breast                                              |
| 7_MSK | MSK031 | 0 | 65 | white | 7(4+3) | 0 | 0 | 1 | 0 | lung, colon, myeloma                                        |
| 7_MSK | MSK035 | 0 | 66 | white | 7(4+3) | 1 | 0 | 0 | 1 | colon                                                       |
| 7_MSK | MSK120 | 0 | 67 | white | 7(4+3) | 0 | 0 | 1 | 1 | ovary, colon, colon                                         |
| 7_MSK | MSK047 | 0 | 68 | white | 7(4+3) | 0 | 0 | 1 | 0 | ovary, nos                                                  |
| 7_MSK | MSK095 | 0 | 49 | white | 8(4+4) | 1 | 1 | 0 | 0 |                                                             |
| 7_MSK | MSK112 | 0 | 50 | white | 8(4+4) | 0 | 0 | 1 | 0 | lung, hodgkin                                               |
| 7_MSK | MSK076 | 0 | 52 | white | 8(4+4) | 0 | 0 | 1 | 0 | colon,gastric, hodgkin                                      |
| 7_MSK | MSK101 | 0 | 52 | white | 8(4+4) | 0 | 0 | 1 | 0 | lymphoma                                                    |
| 7_MSK | MSK100 | 0 | 56 | white | 8(4+4) | 0 | 0 | 1 | 0 | lung, breast                                                |
| 7_MSK | MSK040 | 0 | 57 | white | 8(4+4) | 0 | 0 | 0 | 0 |                                                             |
| 7_MSK | MSK041 | 0 | 58 | white | 8(4+4) | 0 | 0 | 1 | 0 | lung, melanoma, gyn nos, head & neck, nos                   |
| 7_MSK | MSK083 | 0 | 58 | white | 8(4+4) | 0 | 0 | 0 | 0 |                                                             |
| 7_MSK | MSK060 | 0 | 59 | white | 8(4+4) | 0 | 0 | 1 | 1 | breast and cervical and lung, colon, melanoma, breas        |
| 7_MSK | MSK053 | 0 | 62 | white | 8(4+4) | 1 | 0 | 1 | 0 | prostate and bladder,                                       |
| 7_MSK | MSK082 | 0 | 62 | white | 8(4+4) | 0 | 0 | 1 | 1 | lung, lung                                                  |
| 7_MSK | MSK115 | 0 | 62 | white | 8(4+4) | 0 | 0 | 0 | 1 | lymphoma                                                    |
| 7_MSK | MSK096 | 0 | 66 | white | 8(4+4) | 0 | 0 | 0 | 0 |                                                             |
| 7_MSK | MSK038 | 0 | 67 | white | 8(4+4) | 0 | 0 | 0 | 0 |                                                             |
| 7_MSK | MSK094 | 0 | 68 | white | 8(4+4) | 0 | 0 | 1 | 0 | melanoma                                                    |
| 7_MSK | MSK063 | 0 | 69 | white | 8(4+4) | 0 | 0 | 1 | 0 | head & neck                                                 |
| 7_MSK | MSK087 | 0 | 69 | white | 8(4+4) | 0 | 0 | 1 | 0 | colon, skin, breast                                         |
| 7_MSK | MSK102 | 0 | 72 | white | 8(4+4) | 0 | 0 | 1 | 1 | colon, non-hodgkin lymphoma, nos                            |
| 7_MSK | MSK071 | 0 | 75 | white | 8(4+4) | 0 | 0 | 1 | 0 | colon, colon, nos                                           |
| 7_MSK | MSK108 | 0 | 47 | white | 9(4+5) | 0 | 0 | 0 | 0 |                                                             |

|       |              |   |    |          |        |   |   |   |   |                                                   |
|-------|--------------|---|----|----------|--------|---|---|---|---|---------------------------------------------------|
| 7_MSK | MSK002       | 0 | 48 | white    | 9(4+5) | 0 | 0 | 1 | 0 | sarcoma                                           |
| 7_MSK | MSK080       | 0 | 49 | white    | 9(4+5) | 0 | 0 | 0 | 0 |                                                   |
| 7_MSK | MSK034       | 0 | 50 | white    | 9(4+5) | 0 | 1 | 1 | 0 | prostate,prostate,<br>laryngeal                   |
| 7_MSK | MSK070       | 0 | 50 | white    | 9(4+5) | 0 | 0 | 1 | 0 | brain                                             |
| 7_MSK | MSK091       | 0 | 50 | white    | 9(4+5) | 0 | 0 | 1 | 1 | melanoma,<br>breast, childhood<br>leukemia        |
| 7_MSK | MSK030       | 0 | 51 | white    | 9(4+5) | 1 | 0 | 1 | 0 | prostate and<br>colon                             |
| 7_MSK | MSK069       | 0 | 51 | white    | 9(4+5) | 1 | 0 | 1 | 0 | ovary                                             |
| 7_MSK | MSK098       | 0 | 51 | white    | 9(4+5) | 1 | 0 | 1 | 0 | breast                                            |
| 7_MSK | MSK028       | 0 | 54 | white    | 9(4+5) | 1 | 0 | 0 | 1 | nos                                               |
| 7_MSK | MSK106       | 0 | 54 | white    | 9(4+5) | 0 | 0 | 1 | 0 | melanoma and<br>breast                            |
| 7_MSK | MSK067       | 0 | 55 | white    | 9(4+5) | 0 | 0 | 1 | 0 | lung                                              |
| 7_MSK | MSK066       | 0 | 57 | white    | 9(4+5) | 0 | 0 | 1 | 0 | colon                                             |
| 7_MSK | MSK109       | 0 | 58 | white    | 9(4+5) | 0 | 0 | 0 | 1 | breast                                            |
| 7_MSK | MSK048       | 0 | 59 | white    | 9(4+5) | 0 | 0 | 1 | 1 | breast, lung, lung                                |
| 7_MSK | MSK052       | 0 | 59 | white    | 9(4+5) | 0 | 0 | 0 | 0 |                                                   |
| 7_MSK | MSK084       | 0 | 59 | white    | 9(4+5) | 0 | 0 | 1 | 0 | skin, colon, lung<br>and bladder,<br>colon, brain |
| 7_MSK | MSK086       | 0 | 59 | white    | 9(4+5) | 0 | 0 | 1 | 1 | melanoma, nos                                     |
| 7_MSK | MSK122       | 0 | 59 | white    | 9(4+5) | 0 | 0 | 0 | 0 |                                                   |
| 7_MSK | MSK124       | 0 | 59 | white    | 9(4+5) | 1 | 0 | 1 | 0 | prostate and<br>renal, pancreatic,<br>CLL         |
| 7_MSK | MSK114       | 0 | 62 | white    | 9(4+5) | 1 | 0 | 1 | 0 | esophageal and<br>gastric, colon                  |
| 7_MSK | MSK065       | 0 | 63 | white    | 9(4+5) | 0 | 0 | 1 | 0 | bone                                              |
| 7_MSK | MSK085       | 0 | 63 | white    | 9(4+5) | 0 | 1 | 0 | 1 | breast, nos                                       |
| 7_MSK | MSK125       | 0 | 64 | white    | 9(4+5) | 1 | 0 | 0 | 0 | nos                                               |
| 7_MSK | MSK105       | 0 | 65 | white    | 9(4+5) | 1 | 0 | 0 | 1 | pancreatic, lym-<br>phoma, lung,<br>lymphoma      |
| 7_MSK | MSK051       | 0 | 69 | white    | 9(4+5) | 0 | 0 | 0 | 0 |                                                   |
| 7_MSK | MSK029       | 0 | 71 | white    | 9(4+5) | 1 | 0 | 1 | 0 | bladder                                           |
| 7_MSK | MSK068       | 0 | 71 | white    | 9(4+5) | 0 | 0 | 1 | 0 | melanoma                                          |
| 7_MSK | MSK123       | 0 | 71 | white    | 9(4+5) | 0 | 0 | 0 | 0 |                                                   |
| 7_MSK | MSK090       | 0 | 74 | white    | 9(4+5) | 0 | 0 | 0 | 0 |                                                   |
| 7_MSK | MSK044       | 0 | 75 | white    | 9(4+5) | 0 | 0 | 1 | 0 | colon                                             |
| 7_MSK | MSK062       | 0 | 54 | white    | 9(5+4) | 0 | 0 | 0 | 0 |                                                   |
| 7_MSK | MSK057       | 0 | 59 | white    | 9(5+4) | 0 | 0 | 1 | 1 | breast,throat,<br>lung, gastric,<br>gastric       |
| 7_MSK | MSK064       | 0 | 62 | white    | 9(5+4) | 0 | 0 | 0 | 0 |                                                   |
| 7_MSK | MSK103       | 0 | 65 | white    | 9(5+4) | 1 | 0 | 0 | 0 |                                                   |
| 7_MSK | MSK046       | 0 | 66 | white    | 9(5+4) | 0 | 0 | 1 | 0 | squamous cell                                     |
| 7_MSK | MSK107       | 0 | 67 | white    | 9(5+4) | 0 | 0 | 1 | 0 | breast, male<br>breast                            |
| 7_MSK | MSK113       | 0 | 67 | white    | 9(5+4) | 1 | 0 | 1 | 0 | prostate and<br>esophageal, gyn<br>nos            |
| 7_MSK | MSK072       | 0 | 61 | white    | Unk    | 0 | 0 | 1 | 1 | lung, lung, lung,<br>lung                         |
| 7_MSK | MSK032       | 0 | 72 | white    | Unk    | 0 | 0 | 1 | 1 | bladder, colon,<br>leukemia, leuke-<br>mia        |
| TCGA  | tcga-2a-a8vo | 1 |    | white    | 6(3+3) |   |   |   |   |                                                   |
| TCGA  | tcga-hc-8259 | 1 |    | black    | 6(3+3) |   |   |   |   |                                                   |
| TCGA  | tcga-ej-5511 | 1 |    | black    | 7(3+4) |   |   |   |   |                                                   |
| TCGA  | tcga-ej-a8fn | 1 |    | white    | 7(3+4) |   |   |   |   |                                                   |
| TCGA  | tcga-hc-7231 | 1 |    | white    | 7(3+4) |   |   |   |   |                                                   |
| TCGA  | tcga-hc-8256 | 1 |    | black    | 7(3+4) |   |   |   |   |                                                   |
| TCGA  | tcga-hc-7745 | 1 |    | white    | 7(4+3) |   |   |   |   |                                                   |
| TCGA  | tcga-hc-8216 | 1 |    | white    | 7(4+3) |   |   |   |   |                                                   |
| TCGA  | tcga-j9-a8cp | 1 |    | white    | 7(4+3) |   |   |   |   |                                                   |
| TCGA  | tcga-m7-a71z | 1 |    | white    | 7(4+3) |   |   |   |   |                                                   |
| TCGA  | tcga-xk-aaja | 1 |    | hispanic | 7(4+3) |   |   |   |   |                                                   |
| TCGA  | tcga-ch-5752 | 1 |    | white    | 8(4+4) |   |   |   |   |                                                   |
| TCGA  | tcga-g9-7521 | 1 |    | white    | 8(4+4) |   |   |   |   |                                                   |
| TCGA  | tcga-v1-a9zk | 1 |    | white    | 8(4+4) |   |   |   |   |                                                   |

|      |              |   |          |        |
|------|--------------|---|----------|--------|
| TCGA | tcga-v1-a9zr | 1 | white    | 8(4+4) |
| TCGA | tcga-ch-5753 | 1 | white    | 9(4+5) |
| TCGA | tcga-ch-5792 | 1 | white    | 9(4+5) |
| TCGA | tcga-yl-a8si | 1 | white    | 9(4+5) |
| TCGA | tcga-ch-5769 | 1 | white    | 9(5+4) |
| TCGA | tcga-hc-a4zv | 1 | black    | 9(5+4) |
| TCGA | tcga-v1-a9z8 | 1 | white    | 9(5+4) |
| TCGA | tcga-xk-aaiw | 1 | white    | 9(5+4) |
| TCGA | tcga-zg-a9nd | 1 | white    | 9(5+4) |
| TCGA | tcga-ch-5768 | 0 | white    | 6(2+4) |
| TCGA | tcga-2a-a8vl | 0 | white    | 6(3+3) |
| TCGA | tcga-2a-a8vv | 0 | Unk      | 6(3+3) |
| TCGA | tcga-2a-aayo | 0 | white    | 6(3+3) |
| TCGA | tcga-2a-aayu | 0 | white    | 6(3+3) |
| TCGA | tcga-ch-5738 | 0 | white    | 6(3+3) |
| TCGA | tcga-ej-5517 | 0 | white    | 6(3+3) |
| TCGA | tcga-ej-7321 | 0 | black    | 6(3+3) |
| TCGA | tcga-ej-a65m | 0 | black    | 6(3+3) |
| TCGA | tcga-ej-ab20 | 0 | Unk      | 6(3+3) |
| TCGA | tcga-ej-ab27 | 0 | white    | 6(3+3) |
| TCGA | tcga-fc-a8o0 | 0 | white    | 6(3+3) |
| TCGA | tcga-g9-6342 | 0 | white    | 6(3+3) |
| TCGA | tcga-g9-6347 | 0 | Unk      | 6(3+3) |
| TCGA | tcga-g9-6371 | 0 | white    | 6(3+3) |
| TCGA | tcga-g9-7509 | 0 | black    | 6(3+3) |
| TCGA | tcga-h9-a6bx | 0 | white    | 6(3+3) |
| TCGA | tcga-hc-7075 | 0 | Unk      | 6(3+3) |
| TCGA | tcga-hc-7077 | 0 | black    | 6(3+3) |
| TCGA | tcga-hc-7209 | 0 | Unk      | 6(3+3) |
| TCGA | tcga-hc-7748 | 0 | Unk      | 6(3+3) |
| TCGA | tcga-hc-8213 | 0 | white    | 6(3+3) |
| TCGA | tcga-hc-8258 | 0 | black    | 6(3+3) |
| TCGA | tcga-hi-7170 | 0 | white    | 6(3+3) |
| TCGA | tcga-j4-a67q | 0 | white    | 6(3+3) |
| TCGA | tcga-j4-a83k | 0 | white    | 6(3+3) |
| TCGA | tcga-j4-aatv | 0 | white    | 6(3+3) |
| TCGA | tcga-j4-aau2 | 0 | white    | 6(3+3) |
| TCGA | tcga-j9-a8cn | 0 | white    | 6(3+3) |
| TCGA | tcga-m7-a720 | 0 | white    | 6(3+3) |
| TCGA | tcga-qu-a6io | 0 | black    | 6(3+3) |
| TCGA | tcga-qu-a6ip | 0 | white    | 6(3+3) |
| TCGA | tcga-v1-a8mf | 0 | black    | 6(3+3) |
| TCGA | tcga-v1-a8mk | 0 | black    | 6(3+3) |
| TCGA | tcga-v1-a8wn | 0 | black    | 6(3+3) |
| TCGA | tcga-v1-a8ws | 0 | white    | 6(3+3) |
| TCGA | tcga-v1-a9of | 0 | white    | 6(3+3) |
| TCGA | tcga-v1-a9oq | 0 | hispanic | 6(3+3) |
| TCGA | tcga-v1-a9ot | 0 | white    | 6(3+3) |
| TCGA | tcga-vp-a87e | 0 | black    | 6(3+3) |
| TCGA | tcga-xj-a9dq | 0 | white    | 6(3+3) |
| TCGA | tcga-y6-a8tl | 0 | Unk      | 6(3+3) |
| TCGA | tcga-zg-a8qx | 0 | white    | 6(3+3) |
| TCGA | tcga-2a-aayf | 0 | white    | 7(3+4) |
| TCGA | tcga-ch-5739 | 0 | white    | 7(3+4) |
| TCGA | tcga-ch-5740 | 0 | white    | 7(3+4) |
| TCGA | tcga-ch-5743 | 0 | white    | 7(3+4) |
| TCGA | tcga-ch-5745 | 0 | white    | 7(3+4) |
| TCGA | tcga-ch-5746 | 0 | white    | 7(3+4) |
| TCGA | tcga-ch-5750 | 0 | white    | 7(3+4) |
| TCGA | tcga-ch-5763 | 0 | white    | 7(3+4) |
| TCGA | tcga-ch-5765 | 0 | white    | 7(3+4) |
| TCGA | tcga-ch-5789 | 0 | white    | 7(3+4) |
| TCGA | tcga-ch-5790 | 0 | white    | 7(3+4) |
| TCGA | tcga-ch-5791 | 0 | white    | 7(3+4) |
| TCGA | tcga-ch-5794 | 0 | white    | 7(3+4) |
| TCGA | tcga-ej-5496 | 0 | white    | 7(3+4) |
| TCGA | tcga-ej-5497 | 0 | white    | 7(3+4) |
| TCGA | tcga-ej-5508 | 0 | white    | 7(3+4) |
| TCGA | tcga-ej-5509 | 0 | white    | 7(3+4) |

|      |              |   |       |        |
|------|--------------|---|-------|--------|
| TCGA | tcga-ej-5512 | 0 | white | 7(3+4) |
| TCGA | tcga-ej-5515 | 0 | white | 7(3+4) |
| TCGA | tcga-ej-5516 | 0 | white | 7(3+4) |
| TCGA | tcga-ej-5521 | 0 | white | 7(3+4) |
| TCGA | tcga-ej-5522 | 0 | white | 7(3+4) |
| TCGA | tcga-ej-5530 | 0 | white | 7(3+4) |
| TCGA | tcga-ej-5532 | 0 | white | 7(3+4) |
| TCGA | tcga-ej-5542 | 0 | white | 7(3+4) |
| TCGA | tcga-ej-7123 | 0 | white | 7(3+4) |
| TCGA | tcga-ej-7125 | 0 | white | 7(3+4) |
| TCGA | tcga-ej-7218 | 0 | white | 7(3+4) |
| TCGA | tcga-ej-7317 | 0 | white | 7(3+4) |
| TCGA | tcga-ej-7325 | 0 | white | 7(3+4) |
| TCGA | tcga-ej-7327 | 0 | white | 7(3+4) |
| TCGA | tcga-ej-7331 | 0 | white | 7(3+4) |
| TCGA | tcga-ej-7781 | 0 | white | 7(3+4) |
| TCGA | tcga-ej-7785 | 0 | white | 7(3+4) |
| TCGA | tcga-ej-7786 | 0 | white | 7(3+4) |
| TCGA | tcga-ej-7788 | 0 | white | 7(3+4) |
| TCGA | tcga-ej-7791 | 0 | white | 7(3+4) |
| TCGA | tcga-ej-7792 | 0 | white | 7(3+4) |
| TCGA | tcga-ej-7793 | 0 | white | 7(3+4) |
| TCGA | tcga-ej-7794 | 0 | white | 7(3+4) |
| TCGA | tcga-ej-7797 | 0 | white | 7(3+4) |
| TCGA | tcga-ej-a46h | 0 | black | 7(3+4) |
| TCGA | tcga-ej-a46i | 0 | black | 7(3+4) |
| TCGA | tcga-ej-a7nf | 0 | white | 7(3+4) |
| TCGA | tcga-ej-a7ng | 0 | white | 7(3+4) |
| TCGA | tcga-ej-a7nh | 0 | white | 7(3+4) |
| TCGA | tcga-ej-a7nk | 0 | white | 7(3+4) |
| TCGA | tcga-ej-a8fs | 0 | white | 7(3+4) |
| TCGA | tcga-g9-6329 | 0 | white | 7(3+4) |
| TCGA | tcga-g9-6336 | 0 | white | 7(3+4) |
| TCGA | tcga-g9-6339 | 0 | white | 7(3+4) |
| TCGA | tcga-g9-6348 | 0 | white | 7(3+4) |
| TCGA | tcga-g9-6351 | 0 | white | 7(3+4) |
| TCGA | tcga-g9-6353 | 0 | white | 7(3+4) |
| TCGA | tcga-g9-6354 | 0 | asian | 7(3+4) |
| TCGA | tcga-g9-6361 | 0 | white | 7(3+4) |
| TCGA | tcga-g9-6364 | 0 | white | 7(3+4) |
| TCGA | tcga-g9-6365 | 0 | white | 7(3+4) |
| TCGA | tcga-g9-6370 | 0 | white | 7(3+4) |
| TCGA | tcga-g9-6377 | 0 | white | 7(3+4) |
| TCGA | tcga-g9-6378 | 0 | black | 7(3+4) |
| TCGA | tcga-g9-6384 | 0 | white | 7(3+4) |
| TCGA | tcga-g9-6385 | 0 | white | 7(3+4) |
| TCGA | tcga-g9-6498 | 0 | white | 7(3+4) |
| TCGA | tcga-g9-7519 | 0 | white | 7(3+4) |
| TCGA | tcga-g9-7522 | 0 | white | 7(3+4) |
| TCGA | tcga-h9-7775 | 0 | white | 7(3+4) |
| TCGA | tcga-h9-a6by | 0 | white | 7(3+4) |
| TCGA | tcga-hc-7078 | 0 | white | 7(3+4) |
| TCGA | tcga-hc-7079 | 0 | white | 7(3+4) |
| TCGA | tcga-hc-7080 | 0 | white | 7(3+4) |
| TCGA | tcga-hc-7210 | 0 | white | 7(3+4) |
| TCGA | tcga-hc-7211 | 0 | white | 7(3+4) |
| TCGA | tcga-hc-7212 | 0 | white | 7(3+4) |
| TCGA | tcga-hc-7230 | 0 | white | 7(3+4) |
| TCGA | tcga-hc-7736 | 0 | white | 7(3+4) |
| TCGA | tcga-hc-7737 | 0 | black | 7(3+4) |
| TCGA | tcga-hc-7738 | 0 | Unk   | 7(3+4) |
| TCGA | tcga-hc-7740 | 0 | white | 7(3+4) |
| TCGA | tcga-hc-7742 | 0 | white | 7(3+4) |
| TCGA | tcga-hc-7747 | 0 | white | 7(3+4) |
| TCGA | tcga-hc-7750 | 0 | white | 7(3+4) |
| TCGA | tcga-hc-7752 | 0 | white | 7(3+4) |
| TCGA | tcga-hc-7818 | 0 | white | 7(3+4) |
| TCGA | tcga-hc-7820 | 0 | white | 7(3+4) |
| TCGA | tcga-hc-8212 | 0 | white | 7(3+4) |

|      |              |   |          |        |
|------|--------------|---|----------|--------|
| TCGA | tcga-hc-8257 | 0 | black    | 7(3+4) |
| TCGA | tcga-hc-8260 | 0 | black    | 7(3+4) |
| TCGA | tcga-hc-8261 | 0 | black    | 7(3+4) |
| TCGA | tcga-hc-a6al | 0 | white    | 7(3+4) |
| TCGA | tcga-hc-a6ap | 0 | white    | 7(3+4) |
| TCGA | tcga-hc-a6aq | 0 | white    | 7(3+4) |
| TCGA | tcga-hc-a6as | 0 | white    | 7(3+4) |
| TCGA | tcga-hc-a6hy | 0 | white    | 7(3+4) |
| TCGA | tcga-hc-a76w | 0 | white    | 7(3+4) |
| TCGA | tcga-hc-a76x | 0 | white    | 7(3+4) |
| TCGA | tcga-hc-a8d0 | 0 | white    | 7(3+4) |
| TCGA | tcga-hc-a8d1 | 0 | white    | 7(3+4) |
| TCGA | tcga-hi-7169 | 0 | white    | 7(3+4) |
| TCGA | tcga-j4-8200 | 0 | asian    | 7(3+4) |
| TCGA | tcga-j4-a67l | 0 | white    | 7(3+4) |
| TCGA | tcga-j4-a67n | 0 | white    | 7(3+4) |
| TCGA | tcga-j4-a67o | 0 | white    | 7(3+4) |
| TCGA | tcga-j4-a67s | 0 | white    | 7(3+4) |
| TCGA | tcga-j4-a67t | 0 | white    | 7(3+4) |
| TCGA | tcga-j4-a6m7 | 0 | white    | 7(3+4) |
| TCGA | tcga-j4-a83j | 0 | white    | 7(3+4) |
| TCGA | tcga-j4-a83l | 0 | white    | 7(3+4) |
| TCGA | tcga-j4-a83n | 0 | white    | 7(3+4) |
| TCGA | tcga-kc-a4bl | 0 | black    | 7(3+4) |
| TCGA | tcga-kc-a4bn | 0 | black    | 7(3+4) |
| TCGA | tcga-kc-a4bo | 0 | black    | 7(3+4) |
| TCGA | tcga-kc-a7f3 | 0 | white    | 7(3+4) |
| TCGA | tcga-kc-a7f6 | 0 | white    | 7(3+4) |
| TCGA | tcga-kc-a7fa | 0 | white    | 7(3+4) |
| TCGA | tcga-kc-a7fd | 0 | white    | 7(3+4) |
| TCGA | tcga-kc-a7fe | 0 | white    | 7(3+4) |
| TCGA | tcga-kk-a6dy | 0 | black    | 7(3+4) |
| TCGA | tcga-kk-a6e2 | 0 | black    | 7(3+4) |
| TCGA | tcga-kk-a6e3 | 0 | black    | 7(3+4) |
| TCGA | tcga-kk-a6e4 | 0 | black    | 7(3+4) |
| TCGA | tcga-kk-a7av | 0 | black    | 7(3+4) |
| TCGA | tcga-kk-a8i5 | 0 | black    | 7(3+4) |
| TCGA | tcga-m7-a71y | 0 | white    | 7(3+4) |
| TCGA | tcga-m7-a721 | 0 | white    | 7(3+4) |
| TCGA | tcga-qu-a6il | 0 | asian    | 7(3+4) |
| TCGA | tcga-qu-a6im | 0 | white    | 7(3+4) |
| TCGA | tcga-qu-a6in | 0 | white    | 7(3+4) |
| TCGA | tcga-tk-a8ok | 0 | white    | 7(3+4) |
| TCGA | tcga-v1-a8mg | 0 | black    | 7(3+4) |
| TCGA | tcga-v1-a8mj | 0 | black    | 7(3+4) |
| TCGA | tcga-v1-a8ml | 0 | black    | 7(3+4) |
| TCGA | tcga-v1-a8mu | 0 | black    | 7(3+4) |
| TCGA | tcga-v1-a8wl | 0 | black    | 7(3+4) |
| TCGA | tcga-v1-a8x3 | 0 | white    | 7(3+4) |
| TCGA | tcga-vn-a88l | 0 | white    | 7(3+4) |
| TCGA | tcga-vn-a88m | 0 | black    | 7(3+4) |
| TCGA | tcga-vn-a88o | 0 | hispanic | 7(3+4) |
| TCGA | tcga-vn-a88p | 0 | white    | 7(3+4) |
| TCGA | tcga-vp-a875 | 0 | black    | 7(3+4) |
| TCGA | tcga-vp-a87j | 0 | black    | 7(3+4) |
| TCGA | tcga-x4-a8ks | 0 | black    | 7(3+4) |
| TCGA | tcga-xj-a83f | 0 | white    | 7(3+4) |
| TCGA | tcga-xj-a83h | 0 | white    | 7(3+4) |
| TCGA | tcga-ej-a46d | 0 | white    | 8(3+5) |
| TCGA | tcga-ej-a65g | 0 | white    | 8(3+5) |
| TCGA | tcga-ej-a8fp | 0 | white    | 8(3+5) |
| TCGA | tcga-hc-8265 | 0 | white    | 8(3+5) |
| TCGA | tcga-v1-a9o9 | 0 | white    | 8(3+5) |
| TCGA | tcga-v1-a9ox | 0 | white    | 8(3+5) |
| TCGA | tcga-vp-a876 | 0 | white    | 8(3+5) |
| TCGA | tcga-2a-a8w1 | 0 | asian    | 7(4+3) |
| TCGA | tcga-ch-5737 | 0 | white    | 7(4+3) |
| TCGA | tcga-ch-5744 | 0 | white    | 7(4+3) |
| TCGA | tcga-ch-5748 | 0 | white    | 7(4+3) |

|      |              |   |       |        |
|------|--------------|---|-------|--------|
| TCGA | tcga-ch-5762 | 0 | white | 7(4+3) |
| TCGA | tcga-ch-5764 | 0 | white | 7(4+3) |
| TCGA | tcga-ch-5766 | 0 | white | 7(4+3) |
| TCGA | tcga-ch-5767 | 0 | white | 7(4+3) |
| TCGA | tcga-ch-5771 | 0 | white | 7(4+3) |
| TCGA | tcga-ch-5788 | 0 | white | 7(4+3) |
| TCGA | tcga-ej-5494 | 0 | white | 7(4+3) |
| TCGA | tcga-ej-5498 | 0 | white | 7(4+3) |
| TCGA | tcga-ej-5499 | 0 | asian | 7(4+3) |
| TCGA | tcga-ej-5501 | 0 | white | 7(4+3) |
| TCGA | tcga-ej-5502 | 0 | Unk   | 7(4+3) |
| TCGA | tcga-ej-5504 | 0 | white | 7(4+3) |
| TCGA | tcga-ej-5505 | 0 | white | 7(4+3) |
| TCGA | tcga-ej-5510 | 0 | white | 7(4+3) |
| TCGA | tcga-ej-5527 | 0 | white | 7(4+3) |
| TCGA | tcga-ej-5531 | 0 | white | 7(4+3) |
| TCGA | tcga-ej-7115 | 0 | white | 7(4+3) |
| TCGA | tcga-ej-7312 | 0 | white | 7(4+3) |
| TCGA | tcga-ej-7314 | 0 | white | 7(4+3) |
| TCGA | tcga-ej-7315 | 0 | white | 7(4+3) |
| TCGA | tcga-ej-7318 | 0 | white | 7(4+3) |
| TCGA | tcga-ej-7328 | 0 | white | 7(4+3) |
| TCGA | tcga-ej-7330 | 0 | white | 7(4+3) |
| TCGA | tcga-ej-7783 | 0 | white | 7(4+3) |
| TCGA | tcga-ej-7784 | 0 | white | 7(4+3) |
| TCGA | tcga-ej-7789 | 0 | black | 7(4+3) |
| TCGA | tcga-ej-8470 | 0 | black | 7(4+3) |
| TCGA | tcga-ej-a65e | 0 | black | 7(4+3) |
| TCGA | tcga-ej-a6rc | 0 | white | 7(4+3) |
| TCGA | tcga-ej-a7nn | 0 | white | 7(4+3) |
| TCGA | tcga-ej-a8fo | 0 | Unk   | 7(4+3) |
| TCGA | tcga-fc-7708 | 0 | asian | 7(4+3) |
| TCGA | tcga-fc-a66v | 0 | white | 7(4+3) |
| TCGA | tcga-fc-a6hd | 0 | white | 7(4+3) |
| TCGA | tcga-g9-6332 | 0 | white | 7(4+3) |
| TCGA | tcga-g9-6333 | 0 | white | 7(4+3) |
| TCGA | tcga-g9-6338 | 0 | white | 7(4+3) |
| TCGA | tcga-g9-6343 | 0 | white | 7(4+3) |
| TCGA | tcga-g9-6362 | 0 | white | 7(4+3) |
| TCGA | tcga-g9-6363 | 0 | white | 7(4+3) |
| TCGA | tcga-g9-6366 | 0 | white | 7(4+3) |
| TCGA | tcga-g9-6369 | 0 | white | 7(4+3) |
| TCGA | tcga-g9-6373 | 0 | white | 7(4+3) |
| TCGA | tcga-g9-6379 | 0 | white | 7(4+3) |
| TCGA | tcga-g9-6494 | 0 | white | 7(4+3) |
| TCGA | tcga-g9-6496 | 0 | white | 7(4+3) |
| TCGA | tcga-g9-7525 | 0 | white | 7(4+3) |
| TCGA | tcga-hc-7233 | 0 | white | 7(4+3) |
| TCGA | tcga-hc-7744 | 0 | white | 7(4+3) |
| TCGA | tcga-hc-7749 | 0 | white | 7(4+3) |
| TCGA | tcga-hc-7817 | 0 | white | 7(4+3) |
| TCGA | tcga-hc-a6an | 0 | white | 7(4+3) |
| TCGA | tcga-hc-a6ao | 0 | white | 7(4+3) |
| TCGA | tcga-hc-a6hx | 0 | white | 7(4+3) |
| TCGA | tcga-j4-8198 | 0 | black | 7(4+3) |
| TCGA | tcga-j4-a67k | 0 | white | 7(4+3) |
| TCGA | tcga-j4-a67m | 0 | white | 7(4+3) |
| TCGA | tcga-j4-a67r | 0 | white | 7(4+3) |
| TCGA | tcga-j4-a83i | 0 | white | 7(4+3) |
| TCGA | tcga-j4-a83m | 0 | white | 7(4+3) |
| TCGA | tcga-kc-a7f5 | 0 | white | 7(4+3) |
| TCGA | tcga-kk-a59z | 0 | black | 7(4+3) |
| TCGA | tcga-kk-a6e5 | 0 | black | 7(4+3) |
| TCGA | tcga-kk-a7aq | 0 | white | 7(4+3) |
| TCGA | tcga-kk-a7aw | 0 | black | 7(4+3) |
| TCGA | tcga-kk-a7ay | 0 | white | 7(4+3) |
| TCGA | tcga-kk-a7az | 0 | white | 7(4+3) |
| TCGA | tcga-kk-a7b1 | 0 | white | 7(4+3) |
| TCGA | tcga-kk-a8i4 | 0 | white | 7(4+3) |

|      |              |   |          |        |
|------|--------------|---|----------|--------|
| TCGA | tcga-kk-a8i6 | 0 | white    | 7(4+3) |
| TCGA | tcga-kk-a8if | 0 | black    | 7(4+3) |
| TCGA | tcga-kk-a8ig | 0 | white    | 7(4+3) |
| TCGA | tcga-kk-a8ih | 0 | white    | 7(4+3) |
| TCGA | tcga-kk-a8ij | 0 | white    | 7(4+3) |
| TCGA | tcga-kk-a8im | 0 | white    | 7(4+3) |
| TCGA | tcga-m7-a723 | 0 | white    | 7(4+3) |
| TCGA | tcga-m7-a725 | 0 | white    | 7(4+3) |
| TCGA | tcga-tp-a8tt | 0 | white    | 7(4+3) |
| TCGA | tcga-tp-a8tv | 0 | white    | 7(4+3) |
| TCGA | tcga-v1-a8mm | 0 | black    | 7(4+3) |
| TCGA | tcga-v1-a9oy | 0 | white    | 7(4+3) |
| TCGA | tcga-vn-a88n | 0 | white    | 7(4+3) |
| TCGA | tcga-vp-a87c | 0 | black    | 7(4+3) |
| TCGA | tcga-xa-a8jr | 0 | Unk      | 7(4+3) |
| TCGA | tcga-xj-a83g | 0 | black    | 7(4+3) |
| TCGA | tcga-xk-aajp | 0 | white    | 7(4+3) |
| TCGA | tcga-xk-aajr | 0 | white    | 7(4+3) |
| TCGA | tcga-xk-aajt | 0 | white    | 7(4+3) |
| TCGA | tcga-xk-aaju | 0 | white    | 7(4+3) |
| TCGA | tcga-xk-aak1 | 0 | white    | 7(4+3) |
| TCGA | tcga-yl-a8ho | 0 | black    | 7(4+3) |
| TCGA | tcga-yl-a8sh | 0 | white    | 7(4+3) |
| TCGA | tcga-2a-a8vx | 0 | white    | 8(4+4) |
| TCGA | tcga-4l-aa1f | 0 | white    | 8(4+4) |
| TCGA | tcga-ej-5519 | 0 | white    | 8(4+4) |
| TCGA | tcga-ej-5526 | 0 | white    | 8(4+4) |
| TCGA | tcga-ej-7782 | 0 | black    | 8(4+4) |
| TCGA | tcga-ej-8468 | 0 | white    | 8(4+4) |
| TCGA | tcga-ej-8472 | 0 | white    | 8(4+4) |
| TCGA | tcga-ej-8474 | 0 | white    | 8(4+4) |
| TCGA | tcga-ej-a46b | 0 | white    | 8(4+4) |
| TCGA | tcga-ej-a46e | 0 | white    | 8(4+4) |
| TCGA | tcga-ej-a46f | 0 | white    | 8(4+4) |
| TCGA | tcga-ej-a46g | 0 | white    | 8(4+4) |
| TCGA | tcga-ej-a65d | 0 | white    | 8(4+4) |
| TCGA | tcga-ej-a6ra | 0 | white    | 8(4+4) |
| TCGA | tcga-ej-a7nj | 0 | white    | 8(4+4) |
| TCGA | tcga-g9-7510 | 0 | white    | 8(4+4) |
| TCGA | tcga-g9-a9s0 | 0 | white    | 8(4+4) |
| TCGA | tcga-g9-a9s4 | 0 | white    | 8(4+4) |
| TCGA | tcga-g9-a9s7 | 0 | white    | 8(4+4) |
| TCGA | tcga-hc-7819 | 0 | white    | 8(4+4) |
| TCGA | tcga-hc-7821 | 0 | white    | 8(4+4) |
| TCGA | tcga-hc-8262 | 0 | white    | 8(4+4) |
| TCGA | tcga-hc-8266 | 0 | white    | 8(4+4) |
| TCGA | tcga-hc-a48f | 0 | white    | 8(4+4) |
| TCGA | tcga-j4-a6g1 | 0 | white    | 8(4+4) |
| TCGA | tcga-j4-a6g3 | 0 | white    | 8(4+4) |
| TCGA | tcga-kk-a8i9 | 0 | Unk      | 8(4+4) |
| TCGA | tcga-m7-a722 | 0 | white    | 8(4+4) |
| TCGA | tcga-m7-a724 | 0 | white    | 8(4+4) |
| TCGA | tcga-v1-a9oh | 0 | white    | 8(4+4) |
| TCGA | tcga-vn-a88i | 0 | white    | 8(4+4) |
| TCGA | tcga-vn-a88k | 0 | white    | 8(4+4) |
| TCGA | tcga-vn-a88q | 0 | white    | 8(4+4) |
| TCGA | tcga-vn-a88r | 0 | black    | 8(4+4) |
| TCGA | tcga-vn-a943 | 0 | white    | 8(4+4) |
| TCGA | tcga-vp-a87b | 0 | white    | 8(4+4) |
| TCGA | tcga-vp-a87k | 0 | white    | 8(4+4) |
| TCGA | tcga-ww-a8zi | 0 | white    | 8(4+4) |
| TCGA | tcga-xj-a9dk | 0 | white    | 8(4+4) |
| TCGA | tcga-xk-aair | 0 | white    | 8(4+4) |
| TCGA | tcga-xk-aaj3 | 0 | white    | 8(4+4) |
| TCGA | tcga-y6-a9xi | 0 | Unk      | 8(4+4) |
| TCGA | tcga-yl-a8sa | 0 | hispanic | 8(4+4) |
| TCGA | tcga-yl-a8sf | 0 | white    | 8(4+4) |
| TCGA | tcga-yl-a8sl | 0 | white    | 8(4+4) |
| TCGA | tcga-yl-a9wj | 0 | white    | 8(4+4) |



|      |              |   |          |        |
|------|--------------|---|----------|--------|
| TCGA | tcga-2a-a8vt | 0 | asian    | 9(4+5) |
| TCGA | tcga-2a-a8w3 | 0 | white    | 9(4+5) |
| TCGA | tcga-ch-5741 | 0 | white    | 9(4+5) |
| TCGA | tcga-ch-5754 | 0 | white    | 9(4+5) |
| TCGA | tcga-ch-5772 | 0 | white    | 9(4+5) |
| TCGA | tcga-ej-5507 | 0 | white    | 9(4+5) |
| TCGA | tcga-ej-5514 | 0 | white    | 9(4+5) |
| TCGA | tcga-ej-5518 | 0 | white    | 9(4+5) |
| TCGA | tcga-ej-5524 | 0 | white    | 9(4+5) |
| TCGA | tcga-ej-5525 | 0 | white    | 9(4+5) |
| TCGA | tcga-ej-8469 | 0 | black    | 9(4+5) |
| TCGA | tcga-ej-a65b | 0 | white    | 9(4+5) |
| TCGA | tcga-ej-a65f | 0 | white    | 9(4+5) |
| TCGA | tcga-ej-a65j | 0 | white    | 9(4+5) |
| TCGA | tcga-ej-a7nm | 0 | white    | 9(4+5) |
| TCGA | tcga-fc-7961 | 0 | white    | 9(4+5) |
| TCGA | tcga-fc-a5ob | 0 | white    | 9(4+5) |
| TCGA | tcga-g9-6356 | 0 | white    | 9(4+5) |
| TCGA | tcga-g9-6367 | 0 | white    | 9(4+5) |
| TCGA | tcga-g9-6499 | 0 | white    | 9(4+5) |
| TCGA | tcga-hc-7081 | 0 | white    | 9(4+5) |
| TCGA | tcga-hc-7213 | 0 | white    | 9(4+5) |
| TCGA | tcga-hc-7232 | 0 | white    | 9(4+5) |
| TCGA | tcga-hc-8264 | 0 | white    | 9(4+5) |
| TCGA | tcga-hc-a631 | 0 | white    | 9(4+5) |
| TCGA | tcga-hc-a632 | 0 | white    | 9(4+5) |
| TCGA | tcga-hi-7168 | 0 | white    | 9(4+5) |
| TCGA | tcga-j4-aatz | 0 | asian    | 9(4+5) |
| TCGA | tcga-j9-a52c | 0 | white    | 9(4+5) |
| TCGA | tcga-j9-a52d | 0 | white    | 9(4+5) |
| TCGA | tcga-j9-a52e | 0 | white    | 9(4+5) |
| TCGA | tcga-j9-a8ck | 0 | white    | 9(4+5) |
| TCGA | tcga-j9-a8cl | 0 | white    | 9(4+5) |
| TCGA | tcga-kc-a4br | 0 | white    | 9(4+5) |
| TCGA | tcga-kc-a4bv | 0 | asian    | 9(4+5) |
| TCGA | tcga-kk-a59v | 0 | white    | 9(4+5) |
| TCGA | tcga-kk-a59y | 0 | white    | 9(4+5) |
| TCGA | tcga-kk-a5a1 | 0 | black    | 9(4+5) |
| TCGA | tcga-kk-a6e0 | 0 | asian    | 9(4+5) |
| TCGA | tcga-kk-a6e1 | 0 | white    | 9(4+5) |
| TCGA | tcga-kk-a6e6 | 0 | white    | 9(4+5) |
| TCGA | tcga-kk-a6e8 | 0 | white    | 9(4+5) |
| TCGA | tcga-kk-a7ap | 0 | white    | 9(4+5) |
| TCGA | tcga-kk-a7au | 0 | white    | 9(4+5) |
| TCGA | tcga-kk-a7b0 | 0 | white    | 9(4+5) |
| TCGA | tcga-kk-a7b2 | 0 | white    | 9(4+5) |
| TCGA | tcga-kk-a7b3 | 0 | white    | 9(4+5) |
| TCGA | tcga-kk-a7b4 | 0 | white    | 9(4+5) |
| TCGA | tcga-kk-a8i7 | 0 | white    | 9(4+5) |
| TCGA | tcga-kk-a8i8 | 0 | white    | 9(4+5) |
| TCGA | tcga-kk-a8ia | 0 | white    | 9(4+5) |
| TCGA | tcga-kk-a8ib | 0 | white    | 9(4+5) |
| TCGA | tcga-kk-a8ic | 0 | white    | 9(4+5) |
| TCGA | tcga-kk-a8ii | 0 | white    | 9(4+5) |
| TCGA | tcga-kk-a8ik | 0 | white    | 9(4+5) |
| TCGA | tcga-kk-a8il | 0 | white    | 9(4+5) |
| TCGA | tcga-mg-aamc | 0 | white    | 9(4+5) |
| TCGA | tcga-v1-a8wv | 0 | white    | 9(4+5) |
| TCGA | tcga-v1-a8ww | 0 | white    | 9(4+5) |
| TCGA | tcga-v1-a9oa | 0 | white    | 9(4+5) |
| TCGA | tcga-v1-a9z9 | 0 | white    | 9(4+5) |
| TCGA | tcga-v1-a9zg | 0 | white    | 9(4+5) |
| TCGA | tcga-v1-a9zi | 0 | white    | 9(4+5) |
| TCGA | tcga-vp-a878 | 0 | white    | 9(4+5) |
| TCGA | tcga-vp-a879 | 0 | white    | 9(4+5) |
| TCGA | tcga-vp-a87d | 0 | white    | 9(4+5) |
| TCGA | tcga-vp-a87h | 0 | white    | 9(4+5) |
| TCGA | tcga-x4-a8kq | 0 | white    | 9(4+5) |
| TCGA | tcga-xq-a8tb | 0 | hispanic | 9(4+5) |

|      |              |   |                    |         |
|------|--------------|---|--------------------|---------|
| TCGA | tcga-yl-a8hj | 0 | white              | 9(4+5)  |
| TCGA | tcga-yl-a8hk | 0 | white              | 9(4+5)  |
| TCGA | tcga-yl-a8hl | 0 | white              | 9(4+5)  |
| TCGA | tcga-yl-a8hm | 0 | white              | 9(4+5)  |
| TCGA | tcga-yl-a8s8 | 0 | white              | 9(4+5)  |
| TCGA | tcga-yl-a8s9 | 0 | white              | 9(4+5)  |
| TCGA | tcga-yl-a8sb | 0 | white              | 9(4+5)  |
| TCGA | tcga-yl-a8sc | 0 | white              | 9(4+5)  |
| TCGA | tcga-yl-a8sj | 0 | white              | 9(4+5)  |
| TCGA | tcga-yl-a8sk | 0 | white              | 9(4+5)  |
| TCGA | tcga-yl-a8so | 0 | white              | 9(4+5)  |
| TCGA | tcga-yl-a8sp | 0 | white              | 9(4+5)  |
| TCGA | tcga-yl-a8sq | 0 | white              | 9(4+5)  |
| TCGA | tcga-yl-a8sr | 0 | white              | 9(4+5)  |
| TCGA | tcga-yl-a9wh | 0 | white              | 9(4+5)  |
| TCGA | tcga-yl-a9wi | 0 | white              | 9(4+5)  |
| TCGA | tcga-yl-a9wk | 0 | black              | 9(4+5)  |
| TCGA | tcga-yl-a9wl | 0 | white              | 9(4+5)  |
| TCGA | tcga-yl-a9wx | 0 | white              | 9(4+5)  |
| TCGA | tcga-zg-a8qw | 0 | white              | 9(4+5)  |
| TCGA | tcga-zg-a8qz | 0 | white              | 9(4+5)  |
| TCGA | tcga-zg-a9l1 | 0 | white              | 9(4+5)  |
| TCGA | tcga-zg-a9l2 | 0 | white              | 9(4+5)  |
| TCGA | tcga-zg-a9l9 | 0 | white              | 9(4+5)  |
| TCGA | tcga-zg-a9lm | 0 | white              | 9(4+5)  |
| TCGA | tcga-zg-a9ly | 0 | white              | 9(4+5)  |
| TCGA | tcga-zg-a9lz | 0 | white              | 9(4+5)  |
| TCGA | tcga-ej-5495 | 0 | white              | 8(5+3)  |
| TCGA | tcga-ej-5503 | 0 | white              | 8(5+3)  |
| TCGA | tcga-ej-5506 | 0 | white              | 8(5+3)  |
| TCGA | tcga-ej-a8fu | 0 | white              | 8(5+3)  |
| TCGA | tcga-fc-a4ji | 0 | asian              | 8(5+3)  |
| TCGA | tcga-su-a7e7 | 0 | white              | 8(5+3)  |
| TCGA | tcga-vp-a872 | 0 | white              | 8(5+3)  |
| TCGA | tcga-ch-5761 | 0 | white              | 9(5+4)  |
| TCGA | tcga-hc-a8cy | 0 | white              | 9(5+4)  |
| TCGA | tcga-hc-a9te | 0 | white              | 9(5+4)  |
| TCGA | tcga-hc-a9th | 0 | white              | 9(5+4)  |
| TCGA | tcga-hi-7171 | 0 | white              | 9(5+4)  |
| TCGA | tcga-j9-a52b | 0 | white              | 9(5+4)  |
| TCGA | tcga-j9-a8cm | 0 | white              | 9(5+4)  |
| TCGA | tcga-kk-a59x | 0 | black              | 9(5+4)  |
| TCGA | tcga-kk-a6e7 | 0 | hispanic           | 9(5+4)  |
| TCGA | tcga-kk-a8id | 0 | Unk                | 9(5+4)  |
| TCGA | tcga-v1-a9o5 | 0 | white              | 9(5+4)  |
| TCGA | tcga-v1-a9o7 | 0 | white              | 9(5+4)  |
| TCGA | tcga-v1-a9ol | 0 | asian              | 9(5+4)  |
| TCGA | tcga-v1-a9z7 | 0 | white              | 9(5+4)  |
| TCGA | tcga-vp-aa1n | 0 | white              | 9(5+4)  |
| TCGA | tcga-xj-a9di | 0 | white              | 9(5+4)  |
| TCGA | tcga-xj-a9dx | 0 | native<br>american | 9(5+4)  |
| TCGA | tcga-yj-a8sw | 0 | Unk                | 9(5+4)  |
| TCGA | tcga-yl-a9wy | 0 | white              | 9(5+4)  |
| TCGA | tcga-zg-a8qy | 0 | white              | 9(5+4)  |
| TCGA | tcga-zg-a9ky | 0 | white              | 9(5+4)  |
| TCGA | tcga-zg-a9l0 | 0 | white              | 9(5+4)  |
| TCGA | tcga-zg-a9l4 | 0 | white              | 9(5+4)  |
| TCGA | tcga-zg-a9l5 | 0 | white              | 9(5+4)  |
| TCGA | tcga-zg-a9l6 | 0 | white              | 9(5+4)  |
| TCGA | tcga-zg-a9lb | 0 | white              | 9(5+4)  |
| TCGA | tcga-zg-a9ln | 0 | white              | 9(5+4)  |
| TCGA | tcga-zg-a9ls | 0 | white              | 9(5+4)  |
| TCGA | tcga-zg-a9lu | 0 | white              | 9(5+4)  |
| TCGA | tcga-zg-a9m4 | 0 | white              | 9(5+4)  |
| TCGA | tcga-zg-a9mc | 0 | white              | 9(5+4)  |
| TCGA | tcga-zg-a9n3 | 0 | white              | 9(5+4)  |
| TCGA | tcga-zg-a9ni | 0 | white              | 9(5+4)  |
| TCGA | tcga-ch-5751 | 0 | white              | 10(5+5) |

|      |              |   |          |         |
|------|--------------|---|----------|---------|
| TCGA | tcga-g9-7523 | 0 | black    | 10(5+5) |
| TCGA | tcga-xk-aaiv | 0 | white    | 10(5+5) |
| TCGA | tcga-xq-a8ta | 0 | hispanic | 10(5+5) |

**Table S4:** Mean Sequencing Depth of Coverage by Gene for Each Series

| <b>Gene</b>    | <b>1_SU2C_PCF<br/>Discovery</b> | <b>2_SU2C_PCF<br/>Validation</b> | <b>3_RMH</b> | <b>4_UW</b> | <b>5_WC</b> | <b>6_UM</b> | <b>7_MSK</b> |
|----------------|---------------------------------|----------------------------------|--------------|-------------|-------------|-------------|--------------|
| <i>ATM</i>     | 119                             | 153                              | 1412         | 398         | 708         | 113         | 356          |
| <i>ATR</i>     | 125                             | 148                              | 1305         | 377         | 656         | 99          | NA           |
| <i>BAP1</i>    | 212                             | 171                              | NA           | 434         | 702         | 142         | 271          |
| <i>BARD1</i>   | 155                             | 163                              | NA           | 389         | 673         | 246         | 296          |
| <i>BRCA1</i>   | 181                             | 195                              | 1672         | 400         | 770         | 204         | 471          |
| <i>BRCA2</i>   | 144                             | 158                              | 1747         | 365         | 683         | 177         | 520          |
| <i>BRIP1</i>   | 140                             | 169                              | NA           | 322         | 616         | 203         | 218          |
| <i>CHEK2</i>   | 99                              | 131                              | 1207         | 353         | 698         | 306         | 210          |
| <i>FAM175A</i> | 127                             | 136                              | NA           | 394         | 720         | 161         | 352          |
| <i>GEN1</i>    | 133                             | 142                              | NA           | 407         | 657         | 144         | NA           |
| <i>MLH1</i>    | 147                             | 166                              | 1083         | 502         | 864         | 109         | 351          |
| <i>MRE11A</i>  | 110                             | 142                              | 1325         | 384         | 667         | 186         | 271          |
| <i>MSH2</i>    | 115                             | 141                              | 1184         | 358         | 695         | 93          | 344          |
| <i>MSH6</i>    | 200                             | 201                              | 2152         | 411         | 742         | 110         | 369          |
| <i>NBN</i>     | 129                             | 158                              | 1342         | 437         | 660         | 161         | 320          |
| <i>PALB2</i>   | 172                             | 191                              | 1970         | 383         | 754         | 118         | 468          |
| <i>PMS2</i>    | 141                             | 161                              | 1153         | 305         | 576         | 144         | 246          |
| <i>RAD51C</i>  | 136                             | 153                              | 1376         | 371         | 710         | 101         | 423          |
| <i>RAD51D</i>  | 171                             | 163                              | 850          | 423         | 818         | 102         | 297          |
| <i>XRCC2</i>   | 215                             | 191                              | 1242         | 378         | 721         | 92          | NA           |

**Table S5:** Germline DRG Mutations in Metastatic Cases Compared to the General Population and Primary Cases Excluding Case Series 1

| Gene            | Metastatic PC Without Series 1 (n=542) |          | ExAC (without TCGA) |          | Metastatic PC Without Series 1 vs. ExAC |        | Primary PC (n=499) |          | Metastatic PC Without Series 1 vs. Primary PC |        |
|-----------------|----------------------------------------|----------|---------------------|----------|-----------------------------------------|--------|--------------------|----------|-----------------------------------------------|--------|
|                 | Count                                  | Freq (%) | Count               | Freq (%) | RR (95% CI)                             | P      | Count              | Freq (%) | RR (95% CI)                                   | P      |
| <i>ATM</i>      | 8                                      | 1.48%    | 133                 | 0.25%    | 5.9 (2.6-11.5)                          | <0.001 | 5                  | 1.00%    | 1.5 (0.6-2.9)                                 | 0.273  |
| <i>ATR</i>      | 2                                      | 0.37%    | 43                  | 0.08%    | 4.6 (0.6-16.4)                          | 0.072  | 0                  | 0.00%    | -                                             | NA     |
| <i>BAP1*</i>    | 0                                      | 0.00%    | 1                   | 0.00%    | -                                       | NA     | 0                  | 0.00%    | -                                             | NA     |
| <i>BARD1*</i>   | 0                                      | 0.00%    | 38                  | 0.07%    | -                                       | NA     | 1                  | 0.20%    | -                                             | NA     |
| <i>BRCA1</i>    | 4                                      | 0.74%    | 104                 | 0.22%    | 3.3 (0.9-8.5)                           | 0.033  | 3                  | 0.60%    | 1.2 (0.3-3.1)                                 | 0.574  |
| <i>BRCA2</i>    | 28                                     | 5.17%    | 153                 | 0.29%    | 17.9 (12.0-25.6)                        | <0.001 | 1                  | 0.20%    | 25.8 (17.3-36.8)                              | <0.001 |
| <i>BRIP1*</i>   | 1                                      | 0.24%    | 100                 | 0.19%    | 1.3 (0.03-7.2)                          | 0.539  | 1                  | 0.20%    | 1.2 (0.03-6.7)                                | 0.562  |
| <i>CHEK2*</i>   | 10                                     | 1.87%    | 314                 | 0.61%    | 3.1 (1.5-5.6)                           | 0.002  | 2                  | 0.40%    | 4.7 (2.2-8.5)                                 | <0.001 |
| <i>FAM175A*</i> | 1                                      | 0.24%    | 52                  | 0.10%    | 2.5 (0.1-13.8)                          | 0.332  | 0                  | 0.00%    | -                                             | NA     |
| <i>GEN1*</i>    | 2                                      | 0.70%    | 42                  | 0.08%    | 8.8 (1.1-31.5)                          | 0.022  | 0                  | 0.00%    | -                                             | NA     |
| <i>MLH1</i>     | 0                                      | 0.00%    | 11                  | 0.02%    | -                                       | NA     | 0                  | 0.00%    | -                                             | NA     |
| <i>MRE11A</i>   | 1                                      | 0.18%    | 36                  | 0.07%    | 2.7 (0.1-15.1)                          | 0.308  | 1                  | 0.20%    | 0.9 (0.02-5.1)                                | 1.000  |
| <i>MSH2</i>     | 1                                      | 0.18%    | 23                  | 0.04%    | 4.2 (0.1-23.5)                          | 0.210  | 1                  | 0.20%    | 0.9 (0.02-5.1)                                | 1.000  |
| <i>MSH6</i>     | 1                                      | 0.18%    | 41                  | 0.08%    | 2.4 (0.1-13.3)                          | 0.342  | 1                  | 0.20%    | 0.9 (0.02-5.1)                                | 1.000  |
| <i>NBN</i>      | 2                                      | 0.37%    | 61                  | 0.11%    | 3.2 (0.4-11.5)                          | 0.129  | 1                  | 0.20%    | 1.8 (0.2-6.6)                                 | 0.296  |
| <i>PALB2</i>    | 3                                      | 0.55%    | 65                  | 0.12%    | 4.5 (0.9-13.1)                          | 0.030  | 2                  | 0.40%    | 1.4 (0.3-4.0)                                 | 0.483  |
| <i>PMS2</i>     | 2                                      | 0.37%    | 56                  | 0.11%    | 3.5 (0.4-12.4)                          | 0.115  | 1                  | 0.20%    | 1.8 (0.2-6.6)                                 | 0.296  |
| <i>RAD51C</i>   | 1                                      | 0.18%    | 59                  | 0.11%    | 1.7 (0.04-9.2)                          | 0.453  | 2                  | 0.40%    | 0.5 (0.01-2.6)                                | 0.731  |
| <i>RAD51D</i>   | 2                                      | 0.37%    | 40                  | 0.08%    | 4.9 (0.6-17.6)                          | 0.064  | 1                  | 0.20%    | 1.8 (0.2-6.6)                                 | 0.296  |
| <i>XRCC2</i>    | 0                                      | 0.00%    | 23                  | 0.04%    | -                                       | NA     | 0                  | 0.00%    | -                                             | NA     |

\* Metastatic cases with inadequate sequencing for this gene are censored

**Table S6:** Germline DRG Mutations in Metastatic Cases Compared to Primary Cases by NCCN Risk Category

| Case Series | Metastatic PC |          | Localized Low or Intermediate-Risk (n=162) |          | Metastatic vs. Low or Intermediate-Risk PC |        | Localized High-Risk (n=337) |          | Metastatic vs. High-Risk PC |        |
|-------------|---------------|----------|--------------------------------------------|----------|--------------------------------------------|--------|-----------------------------|----------|-----------------------------|--------|
|             | Count         | Freq (%) | Count                                      | Freq (%) | OR (95% CI)                                | P      | Count                       | Freq (%) | OR (95% CI)                 | P      |
| 1-7         | 82            | 11.85%   | 4                                          | 2.47%    | 5.3 (1.9-20.2)                             | <0.001 | 19                          | 5.64%    | 2.2 (1.3-4.0)               | <0.001 |
| 2-7*        | 67            | 14.11%   | 4                                          | 2.47%    | 5.6 (2.0-21.3)                             | 0.002  | 19                          | 5.64%    | 2.4 (1.4-4.2)               | 0.001  |

\* Removes 150 cases previously reported in Robinson et al.
